# Supplementary material for: Identification of a GABAergic neural circuit governing leptin signaling deficiency-induced obesity
Source: eLife. 2023 Apr 12;12:e82649. doi: 10.7554/eLife.82649 (PMC10097419; doi:10.7554/eLife.82649)
Supplement: Figure 1—source data 1. [file elife-82649-fig1-data1.xlsx]

## Sheet: Figure 1F
Mice	Control	Lepr KO
1	0.96	0.09
2	0.91	0.12
3	0.89	0.1
4	1.3	0.29
5	1.05	0.3
6	0.77	0.15
7	0.83	0.11
8	1.44	0.07

## Sheet: Figure 1G
	Control									Lepr KO									Control									Lepr KO
Daily FI (g)	mice 1	mice 2	mice 3	mice 4	mice 5	mice 6	mice 7	mice 8		mice 1	mice 2	mice 3	mice 4	mice 5	mice 6	mice 7	mice 8	Calorie (kcal)	mice 1	mice 2	mice 3	mice 4	mice 5	mice 6	mice 7	mice 8		mice 1	mice 2	mice 3	mice 4	mice 5	mice 6	mice 7	mice 8
0	3.08	3.31	3.61	3.19	3.86	2.97	4.17	2.86		3.81	2.78	3.08	2.78	3.78	4.36	4.36	4.28		11.1	11.9	13	11.5	13.9	10.7	15	10.3		13.7	10	11.1	10	13.6	15.7	15.7	15.4
1	3.72	3	3.61	3.72	3.64	3.67	3.61	3.72		3.5	4.11	3.08	3.31	4.44	3.42	4.11	3.33		13.4	10.8	13	13.4	13.1	13.2	13	13.4		12.6	14.8	11.1	11.9	16	12.3	14.8	12
2	3.97	3.39	4.19	3.86	3.33	3.97	3.03	3.81		3.97	4.19	3.64	3.97	2.83	3.67	4.31	3.92		14.3	12.2	15.1	13.9	12	14.3	10.9	13.7		14.3	15.1	13.1	14.3	10.2	13.2	15.5	14.1
3	3.81	3.56	3.92	4.03	4.11	3	4.25	3.25		3.92	4.14	3.81	3.81	3.97	3.5	2.94	2.83		13.7	12.8	14.1	14.5	14.8	10.8	15.3	11.7		14.1	14.9	13.7	13.7	14.3	12.6	10.6	10.2
4	4.22	3.78	4.03	4	3.69	4.39	4.36	3.5		4.69	4.83	4.28	4.94	4.67	4.25	4.31	4.61		15.2	13.6	14.5	14.4	13.3	15.8	15.7	12.6		16.9	17.4	15.4	17.8	16.8	15.3	15.5	16.6
5	3.92	3.86	3.78	3.56	3.17	4.39	3.22	4.17		4.33	4.83	4.28	4.94	5.06	5.61	4.92	5.36		14.1	13.9	13.6	12.8	11.4	15.8	11.6	15		15.6	17.4	15.4	17.8	18.2	20.2	17.7	19.3
6	3.81	3.72	3.81	4.17	3.28	4	3.36	3.33		4.44	4.83	4.97	4.97	4.97	5.19	5.81	5.25		13.7	13.4	13.7	15	11.8	14.4	12.1	12		16	17.4	17.9	17.9	17.9	18.7	20.9	18.9
7	3.39	2.89	3.72	3.5	3.08	3.58	3.89	4.06		5.22	5.81	4.69	5.64	5.81	5.61	5.5	5.06		12.2	10.4	13.4	12.6	11.1	12.9	14	14.6		18.8	20.9	16.9	20.3	20.9	20.2	19.8	18.2
8	4.03	3.19	3.72	3.72	2.89	3.69	3.58	4.17		4.64	5.64	4.86	5.33	5.06	4.92	5.53	5.67		14.5	11.5	13.4	13.4	10.4	13.3	12.9	15		16.7	20.3	17.5	19.2	18.2	17.7	19.9	20.4
9	3.72	3	3.92	3.81	2.83	4.22	4.14	4.44		5.36	5.5	5.17	5.5	4.81	5.72	5.69	4.89		13.4	10.8	14.1	13.7	10.2	15.2	14.9	16		19.3	19.8	18.6	19.8	17.3	20.6	20.5	17.6
10	3.5	3.19	3.5	3.72	4.25	4.25	2.83	4.08		5.22	6.11	5.33	5.5	5.56	4.97	5.42	5.14		12.6	11.5	12.6	13.4	15.3	15.3	10.2	14.7		18.8	22	19.2	19.8	20	17.9	19.5	18.5
11	3.5	2.67	3.81	3.19	3.58	3.83	3	3.86		4.78	5.64	4.86	5.17	5.06	5.31	5.75	5.81		12.6	9.6	13.7	11.5	12.9	13.8	10.8	13.9		17.2	20.3	17.5	18.6	18.2	19.1	20.7	20.9
12	3.81	3.72	3.81	3.39	3.94	4.39	3.36	3.28		5.06	4.86	5.81	5.17	5.75	5.28	5.58	5.67		13.7	13.4	13.7	12.2	14.2	15.8	12.1	11.8		18.2	17.5	20.9	18.6	20.7	19	20.1	20.4
13	3.92	4	3.61	4.11	3.83	4.28	3.86	4.22		5.36	5.94	5.17	5.03	5.19	4.75	5.31	4.94		14.1	14.4	13	14.8	13.8	15.4	13.9	15.2		19.3	21.4	18.6	18.1	18.7	17.1	19.1	17.8
14	3.81	4.22	3.72	3.5	3.5	3.5	3.69	4.33		6.36	6.42	5.33	6.58	5.53	5.69	5.56	5.69		13.7	15.2	13.4	12.6	12.6	12.6	13.3	15.6		22.9	23.1	19.2	23.7	19.9	20.5	20	20.5
15	3.94	3.5	3.5	4.22	3.14	2.94	3.94	4.36		5.5	5.64	5.03	5.64	4.97	5.81	5.81	4.72		14.2	12.6	12.6	15.2	11.3	10.6	14.2	15.7		19.8	20.3	18.1	20.3	17.9	20.9	20.9	17
16	4.22	3.64	3.81	4.39	3.5	3.97	3.44	4.25		5.53	5.33	5.33	5.33	4.92	5.25	4.75	4.86		15.2	13.1	13.7	15.8	12.6	14.3	12.4	15.3		19.9	19.2	19.2	19.2	17.7	18.9	17.1	17.5
17	4.53	4.22	3.5	2.92	3	2.92	3.94	3		5.94	5.56	5.78	6.22	4.97	5.36	5.47	4.92		16.3	15.2	12.6	10.5	10.8	10.5	14.2	10.8		21.4	20	20.8	22.4	17.9	19.3	19.7	17.7
18	3.81	3.83	3.36	3.36	3.53	2.97	4.42	3.44		5.17	5.33	5.58	5.33	4.81	4.92	5.56	5.78		13.7	13.8	12.1	12.1	12.7	10.7	15.9	12.4		18.6	19.2	20.1	19.2	17.3	17.7	20	20.8
19	3.94	3.5	3.36	3.64	4.06	3.53	3.67	3.44		6.64	5.86	5.06	5.58	5.56	5.06	5.44	5.14		14.2	12.6	12.1	13.1	14.6	12.7	13.2	12.4		23.9	21.1	18.2	20.1	20	18.2	19.6	18.5
20	3.61	3.19	3.22	2.92	3.75	3.81	3.58	4.06		5.42	4.28	4.53	5.86	5.28	5.75	5.67	4.78		13	11.5	11.6	10.5	13.5	13.7	12.9	14.6		19.5	15.4	16.3	21.1	19	20.7	20.4	17.2
21	3.64	4.39	3.5	3.22	4.28	3.17	4.03	4.42		4.92	4.81	4	5.06	5.47	5.11	5.42	5.72		13.1	15.8	12.6	11.6	15.4	11.4	14.5	15.9		17.7	17.3	14.4	18.2	19.7	18.4	19.5	20.6
22	3.64	3.5	3.36	2.78	4.14	3.44	4.14	3.39		5.42	5.06	4.81	5.58	4.89	5.42	5.72	5.61		13.1	12.6	12.1	10	14.9	12.4	14.9	12.2		19.5	18.2	17.3	20.1	17.6	19.5	20.6	20.2
23	3.22	3.36	3.64	3.22	2.89	3.53	4.33	3.08		5.17	4.53	4.81	5.33	5.11	5.03	5.58	5.58		11.6	12.1	13.1	11.6	10.4	12.7	15.6	11.1		18.6	16.3	17.3	19.2	18.4	18.1	20.1	20.1
24	2.64	4.22	3.06	3.11	3.5	3.81	3.36	3.86		5.67	5.86	5.33	5.86	5.72	4.97	5.22	5.61		9.5	15.2	11	11.2	12.6	13.7	12.1	13.9		20.4	21.1	19.2	21.1	20.6	17.9	18.8	20.2
25	3.22	3.64	2.92	2.92	3.72	3.11	3.86	2.86		5.17	4.81	4.28	5.33	4.97	5.78	5.53	5.06		11.6	13.1	10.5	10.5	13.4	11.2	13.9	10.3		18.6	17.3	15.4	19.2	17.9	20.8	19.9	18.2
26	3.42	3.97	2.94	2.67	3.69	4.39	3.97	3		5.17	5.08	4.67	5.72	4.92	5.25	4.97	4.75		12.3	14.3	10.6	9.6	13.3	15.8	14.3	10.8		18.6	18.3	16.8	20.6	17.7	18.9	17.9	17.1
27	3.75	3.86	3.14	3.58	4.33	4.22	3.78	3.81		5.5	6.44	5.36	6.03	4.97	4.78	4.81	5.47		13.5	13.9	11.3	12.9	15.6	15.2	13.6	13.7		19.8	23.2	19.3	21.7	17.9	17.2	17.3	19.7
28	3.56	4.19	2.83	2.67	3.22	4.14	4.31	4.36		5.92	5.44	5.69	4.97	4.97	5.58	5.17	5.31		12.8	15.1	10.2	9.6	11.6	14.9	15.5	15.7		21.3	19.6	20.5	17.9	17.9	20.1	18.6	19.1
																		total calorie	386.4	376.3	370.4	363.9	373.5	389.1	392.9	390.3		532	538.8	499	541.8	518.4	526.7	540.7	524.7

## Sheet: Figure 1H
	Control									Lepr KO									Control									Lepr KO
Daily bw (g)	mice 1	mice 2	mice 3	mice 4	mice 5	mice 6	mice 7	mice 8		mice 1	mice 2	mice 3	mice 4	mice 5	mice 6	mice 7	mice 8	normalized BW	mice 1	mice 2	mice 3	mice 4	mice 5	mice 6	mice 7	mice 8		mice 1	mice 2	mice 3	mice 4	mice 5	mice 6	mice 7	mice 8
0	23.21	21.8	19.45	22.63	25.33	21.15	20.67	23.71		24.1	20.8	19.92	24.13	25.5	23.77	24.34	21.75	0	100	100	100	100	100	100	100	100		100	100	100	100	100	100	100	100
1	23.58	22.08	19.68	23.67	23.08	21.19	20.79	23.8		23.81	20.55	19.76	24.13	25.98	23.94	24.53	22.08	1	101.6	101.3	101.2	104.6	91.1	100.2	100.6	100.4		98.8	98.8	99.2	100	101.9	100.7	100.8	101.5
2	24.39	22.54	19.94	23.67	23.08	21.28	20.9	23.85		22.73	21.28	20.22	24.64	26.49	24.17	24.78	22.29	2	105.1	103.4	102.5	104.6	91.1	100.6	101.1	100.6		94.3	102.3	101.5	102.1	103.9	101.7	101.8	102.5
3	24.39	23.81	20.44	24.37	25.23	21.36	20.98	23.9		24.68	22.01	21.14	24.54	26.85	24.36	25.05	22.64	3	105.1	109.2	105.1	107.7	99.6	101	101.5	100.8		102.4	105.8	106.1	101.7	105.3	102.5	102.9	104.1
4	24.95	23.54	20.29	25.16	26.82	21.42	21.06	23.95		24.68	21.05	22.43	25.43	27.21	24.58	25.36	22.97	4	107.5	108	104.3	111.2	105.9	101.3	101.9	101		102.4	101.2	112.6	105.4	106.7	103.4	104.2	105.6
5	25.39	23.63	20.58	24.8	26.62	21.47	21.23	24.04		26.15	23.13	23.13	25.84	27.59	24.84	25.7	23.19	5	109.4	108.4	105.8	109.6	105.1	101.5	102.7	101.4		108.5	111.2	116.1	107.1	108.2	104.5	105.6	106.6
6	25.76	23.81	20.15	24.8	26.72	21.51	21.35	24.09		27.14	24.17	24.66	25.43	27.95	25.08	25.95	23.38	6	111	109.2	103.6	109.6	105.5	101.7	103.3	101.6		112.6	116.2	123.8	105.4	109.6	105.5	106.6	107.5
7	25.3	23.3	20.44	24.62	26.62	21.59	21.46	24.16		27.23	25.27	25.04	25.75	28.31	25.24	26.26	23.66	7	109	106.9	105.1	108.8	105.1	102.1	103.8	101.9		113	121.5	125.7	106.7	111	106.2	107.9	108.8
8	24.49	23.39	20.07	24.28	26.39	21.64	21.6	24.21		26.15	25.44	25.04	26.45	28.74	25.51	26.48	23.88	8	105.5	107.3	103.2	107.3	104.2	102.3	104.5	102.1		108.5	122.3	125.7	109.6	112.7	107.3	108.8	109.8
9	24.21	22.89	19.94	24.55	26.95	21.74	21.72	24.23		25.67	25.52	24.88	27.05	29.12	25.67	26.73	24.1	9	104.3	105	102.5	108.5	106.4	102.8	105.1	102.2		106.5	122.7	124.9	112.1	114.2	108	109.8	110.8
10	25.02	22.89	20.15	24.37	27.58	21.78	21.83	24.33		26.46	25.52	24.5	26.95	29.66	25.93	26.97	24.38	10	107.8	105	103.6	107.7	108.9	103	105.6	102.6		109.8	122.7	123	111.7	116.3	109.1	110.8	112.1
11	25.21	22.48	19.8	24.89	28.34	21.81	21.91	24.37		26.75	25.6	24.34	27.36	30.09	26.15	27.19	24.75	11	108.6	103.1	101.8	110	111.9	103.1	106	102.8		111	123.1	122.2	113.4	118	110	111.7	113.8
12	25.39	22.54	19.72	24.62	29.21	21.85	22.03	24.45		27.81	26	24.58	27.36	30.5	26.41	27.43	25.12	12	109.4	103.4	101.4	108.8	115.3	103.3	106.6	103.1		115.4	125	123.4	113.4	119.6	111.1	112.7	115.5
13	25.21	22.63	19.72	24.89	29.08	21.89	22.16	24.52		27.43	26.25	24.66	27.46	30.88	26.69	27.72	25.43	13	108.6	103.8	101.4	110	114.8	103.5	107.2	103.4		113.8	126.2	123.8	113.8	121.1	112.3	113.9	116.9
14	25.48	22.74	19.68	24.98	29.84	21.95	22.26	24.59		27.62	26.31	24.88	27.97	31.39	26.88	27.94	25.69	14	109.8	104.3	101.2	110.4	117.8	103.8	107.7	103.7		114.6	126.5	124.9	115.9	123.1	113.1	114.8	118.1
15	25.76	22.8	19.66	25.5	30.6	21.97	22.41	24.71		27.72	27.12	25.18	28.76	31.88	27.05	28.31	25.97	15	111	104.6	101.1	112.7	120.8	103.9	108.4	104.2		115	130.4	126.4	119.2	125	113.8	116.3	119.4
16	25.48	22.3	19.66	25.75	30.8	22.02	22.51	24.75		28.12	26.96	25.42	29.17	32.51	27.31	28.7	26.3	16	109.8	102.3	101.1	113.8	121.6	104.1	108.9	104.4		116.7	129.6	127.6	120.9	127.5	114.9	117.9	120.9
17	26.3	22.63	20.23	25.16	31.03	22.06	22.67	24.82		29.09	27.21	25.72	29.78	33.15	27.57	28.94	26.67	17	113.3	103.8	104	111.2	122.5	104.3	109.7	104.7		120.7	130.8	129.1	123.4	130	116	118.9	122.6
18	26.58	22.72	20.15	26.02	31.23	22.17	22.84	24.92		29.4	28	25.58	29.39	33.63	27.81	29.18	26.97	18	114.5	104.2	103.6	115	123.3	104.8	110.5	105.1		122	134.6	128.4	121.8	131.9	117	119.9	124
19	27.04	22.8	20.23	25.84	31.13	22.23	22.99	25.04		30.17	28.48	25.8	29.87	34.02	28.1	29.45	27.3	19	116.5	104.6	104	114.2	122.9	105.1	111.2	105.6		125.2	136.9	129.5	123.8	133.4	118.2	121	125.5
20	27.29	23.3	18.83	26.45	31.46	22.29	23.09	25.09		30.08	28.39	25.58	29.87	34.55	28.24	29.84	27.69	20	117.6	106.9	96.8	116.9	124.2	105.4	111.7	105.8		124.8	136.5	128.4	123.8	135.5	118.8	122.6	127.3
21	26.95	23.54	19.1	26.21	31.03	22.38	23.27	25.2		30.56	29.04	25.72	29.78	34.96	28.5	30.18	27.95	21	116.1	108	98.2	115.8	122.5	105.8	112.6	106.3		126.8	139.6	129.1	123.4	137.1	119.9	124	128.5
22	27.29	22.98	19.72	26.36	31.46	22.46	23.38	25.32		30.37	29.2	26.17	31.39	35.55	28.76	30.4	28.34	22	117.6	105.4	101.4	116.5	124.2	106.2	113.1	106.8		126	140.4	131.4	130.1	139.4	121	124.9	130.3
23	26.83	23.3	20.48	26.18	31.33	22.48	23.52	25.44		30.15	28.83	25.82	31.06	36.06	29.07	30.67	28.58	23	115.6	106.9	105.3	115.7	123.7	106.3	113.8	107.3		125.1	138.6	129.6	128.7	141.4	122.3	126	131.4
24	26.11	23.72	21.28	26.21	30.9	22.55	23.65	25.54		29.79	28.25	25.42	30.5	36.77	29.38	31.06	28.95	24	112.5	108.8	109.4	115.8	122	106.6	114.4	107.7		123.6	135.8	127.6	126.4	144.2	123.6	127.6	133.1
25	26.85	23.72	20.71	26.27	30.98	22.61	23.83	25.63		30.66	28.56	25.82	30.91	37.36	29.64	31.4	29.19	25	115.7	108.8	106.5	116.1	122.3	106.9	115.3	108.1		127.2	137.3	129.6	128.1	146.5	124.7	129	134.2
26	27.67	23.63	20.64	26.36	31.11	22.67	23.94	25.73		31.35	29.29	26	31.13	37.84	29.86	31.76	29.49	26	119.2	108.4	106.1	116.5	122.8	107.2	115.8	108.5		130.1	140.8	130.5	129	148.4	125.6	130.5	135.6
27	27.48	23.39	20.29	26.45	31.16	22.76	24.06	25.82		31.45	29.2	26.14	31.25	38.43	30.14	32.2	29.93	27	118.4	107.3	104.3	116.9	123	107.6	116.4	108.9		130.5	140.4	131.2	129.5	150.7	126.8	132.3	137.6
28	28.13	23.48	20.36	26.54	31.18	22.78	24.2	25.89		32.54	29.68	26.35	31.54	38.86	30.45	32.64	30.28	28	121.2	107.7	104.7	117.3	123.1	107.7	117.1	109.2		135	142.7	132.3	130.7	152.4	128.1	134.1	139.2
change of BW	4.92	1.68	0.91	3.91	5.85	1.63	3.53	2.18		8.44	8.88	6.43	7.41	13.36	6.68	8.3	8.53

## Sheet: Figure 1I
	Control					Lepr KO
Mice/time (min)	0	15	30	60	120	0	15	30	60	120
1	121	257	296	192	166	224*	434	461	406*	196
2	121	252	280	176	138	135	299	428	274	165
3	106	229	267	195	133	86*	298	284*	212	141
4	122	249	289	171	155	146	307	253*	292	177
5	92	253	290	177	162	122	256	351	218	142
6	90	221	314	187	122	166	415	495	324	211
7	138	284	243	165	174	132	332	455	235	152
8	104	235	294	186	154	142	337	430	259	171

## Sheet: Figure 1J-M
1J
Mice/groups	Control	Lepr KO	Bic icv	KO+Bic	Calorie	Control	Lepr KO	Bic icv	KO+Bic
1	1.17	1.31	1	1.03	1	4.2	4.7	3.6	3.7
2	1	1.22	0.7	0.69	2	3.6	4.4	2.5	2.5
3	1.19	1.42	1.36	0.53	3	4.3	5.1	4.9	1.9
4	1.19	1.33	1.19	1.06	4	4.3	4.8	4.3	3.8
5	0.89	1.47	0.81	0.97	5	3.2	5.3	2.9	3.5
6	0.97	1.33	1.03	1.36	6	3.5	4.8	3.7	4.9
7	1.36	1.67	0.83	0.47	7	4.9	6	3	1.7
8	1.33	1.08	0.61	0.69	8	4.8	3.9	2.2	2.5
1K
	Control									Lepr KO
	1	2	3	4	5	6	7	8		1	2	3	4	5	6	7	8
total calorie	386.4	376.3	370.4	363.9	373.5	389.1	392.9	390.3		532	538.8	499	541.8	518.4	526.7	540.7	524.7
change of BW	4.92	1.68	0.91	3.91	5.85	1.63	3.53	2.18		8.44	8.88	6.43	7.41	13.36	6.68	8.3	8.53
Feed efficiency	12.7	4.5	2.5	10.7	15.7	4.2	9	5.6		15.9	16.5	12.9	13.7	25.8	12.7	15.4	16.3
	Bic icv									KO+Bic
	1	2	3	4	5	6	7	8		1	2	3	4	5	6	7	8
total calorie	329.7	345.5	367.1	359.4	388.4	372.6	317.9	336.1		401.5	465.7	476.3	508.5	476.3	466.2	521.1	451.7
change of BW	0.89	1.35	1.69	1.26	2.95	2.57	1.02	1.48		4.42	3.03	4.62	6.81	6.05	3.36	7.92	4.61
Feed efficiency	2.7	3.9	4.6	3.5	7.6	6.9	3.2	4.4		11	6.5	9.7	13.4	12.7	7.2	15.2	10.2
1L
	Control									Lepr KO
Weight (g)	1	2	3	4	5	6	7	8	Weight (g)	1	2	3	4	5	6	7	8
Visc WAT	0.72	0.81	0.55	0.62	0.82	0.92	0.47	0.52		1.25	2.67	1.93	2.13	0.74	3.18	1.83	2.25
BAT	0.23	0.63	0.4	0.32	0.17	0.75	0.28	0.38		0.37	0.21	0.65	0.44	0.25	0.26	0.77	0.4
	Bic icv									KO+Bic
	1	2	3	4	5	6	7	8		1	2	3	4	5	6	7	8
Visc WAT	0.52	0.74	0.41	0.33	0.42	0.84	0.36	0.59		1.34	0.9	1.72	1.96	1.11	0.84	0.96	1.93
BAT	0.22	0.39	0.41	0.18	0.52	0.4	0.33	0.61		0.49	0.62	0.57	0.6	0.28	0.49	0.38	0.52
1M
	Control									Lepr KO
RQ (VCO2/VO2)	1	2	3	4	5	6	7	8		1	2	3	4	5	6	7	8
	0.95	0.98	0.9	0.96	0.88	0.99	0.93	0.99		0.87	0.88	0.9	0.85	0.8	0.9	0.95	0.83
	Bic icv									KO+Bic
	1	2	3	4	5	6	7	8		1	2	3	4	5	6	7	8
	0.95	0.97	0.86	0.99	0.98	0.9	0.96	0.95		0.93	0.93	0.98	0.99	0.94	0.93	0.9	0.97

## Sheet: Figure 1N
	Control					Lepr KO					Bic icv					KO+Bic
Mice/time (min)	0	15	30	60	120	0	15	30	60	120	0	15	30	60	120	0	15	30	60	120
1	130	278	308	254	140	130	343	360	270	143	108	265	305	219	113	107	238	329	211	113
2	124	283	340	266	133	127	365	386	288	196	113	221	268	229	139	96	276	385	308	156
3	130	302	260	242	125	110	309	357	279	188	135	286	298	238	147	135	343	319	256	122
4	125	270	298	243	147	108	296	329	227	107	97	217	275	175	102	108	296	324	254	109
5	115	253	363	297	144	134	395	422	354	228	99	192	224	153	96	117	257	296	216	95
6	106	263	292	206	119	117	287	384	259	137	119	168	265	188	157	126	269	320	229	136
7	108	265	255	228	127	139	382	412	321	223	123	274	311	265	193	142	277	334	286	174
8	134	291	363	271	142	148	422	365	236	120	138	229	284	259	157	105	302	367	266	129
