# Supplementary material for: Identification of a GABAergic neural circuit governing leptin signaling deficiency-induced obesity
Source: eLife. 2023 Apr 12;12:e82649. doi: 10.7554/eLife.82649 (PMC10097419; doi:10.7554/eLife.82649)
Supplement: Figure 2—source data 1. [file elife-82649-fig2-data1.xlsx]

## Sheet: Figure 2A
Mice	Control				Lepr KO
	DMH	PVH	PVT	PBN	DMH	PVH	PVT	PBN
1	2.87	5.36	0.58	2.57	0.56	2.58	3.25	2.21
2	3.51	2.41	2.57	1.25	0.98	2.85	1.24	0.87
3	0.95	2.74	3.54	0.68	1.52	2.65	0.98	1.63
4	1.34	1.98	1.28	3.41	1.24	1.24	2.21	2.22
5	2.87	5.89	0.44	1.94	0.56	2.52	1.19	3.15
6	3.51	2.76	2.71	1.12	2.01	2.85	1.44	1.81
7	0.95	2.21	4.15	0.82	1.01	2.65	3.95	0.75
8	1.34	1.63	0.65	4.04	1.24	0.72	1.5	1.23

## Sheet: Figure 2C
Mice	Control					Leptin					Leptin+DT
	DMH	PVH	PVT	DRN	PBN	DMH	PVH	PVT	DRN	PBN	DMH	PVH	PVT	DRN	PBN
1	3	2	5	8	5	59	45	25	28	14	7	36	21	30	15
2	5	5	6	4	6	54	58	12	21	10	15	42	15	24	17
3	7	5	4	6	5	42	37	30	14	14	13	34	20	17	13
4	4	3	3	1	4	27	64	27	39	19	17	51	31	22	8
5	10	4	11	12	11	65	77	38	45	27	23	62	19	36	6
6	2	6	1	2	6	48	24	17	8	6	9	23	32	12	20
7	2	5	2	2	2	52	40	10	25	9	11	45	10	25	18
8	5	0	4	3	1	17	63	29	24	15	9	33	27	19	9

## Sheet: Figure 2L
%	NPY/HSV	HSV/NPY
	66.2	36.4
	57.2	55.9
	38.7	27.9
	46.9	33.1
	55.7	45.5
	60.4	29.8
	72.6	38.7
	38.7	46.8
