# Supplementary material for: Identification of a GABAergic neural circuit governing leptin signaling deficiency-induced obesity
Source: eLife. 2023 Apr 12;12:e82649. doi: 10.7554/eLife.82649 (PMC10097419; doi:10.7554/eLife.82649)
Supplement: Figure 3—source data 1. [file elife-82649-fig3-data1.xlsx]

## Sheet: Figure 3E-K
3E	Amplitude (pA)
	Baseline	TTX+ 4-AP	TTX +4-AP+ Bicuculline
	116	122	3.1
	157.5	153.2	9.2
	87.9	98.9	5.6
	128.8	119.6	1.2
	144.7	140.1	0.5
	85.3	90.6	2.3
	102.3	95.4	0.9
3G	Firing rate(Hz)
	Baseline	Stim
	4.88	1.01
	2.58	0.84
	2.28	0.12
	3.02	1.09
	4.01	1.01
	1.95	0.98
	2.37	0.59
3H	RM(mV)
	Baseline	Stim
	-41.56	-44.49
	-38.91	-42.42
	-44.22	-47.97
	-44.61	-47.91
	-44.86	-48.62
	-45.56	-47.52
	-42.54	-48.34
3I	Response	No response
	9	6
3J	Firing rate(Hz)
	Baseline	Leptin
	4.88	1.44
	2.58	9.71
	2.28	4.45
	1.93	2.55
	1.89	2.1
	1.522	2.83
	2.1	3.45
3K	RM(mV)
	Baseline	Leptin
	-41.56	-41.44
	-38.91	-33.48
	-44.22	-39.09
	-45.56	-42.88
	-39.22	-36.82
	-42.8	-39.89
	-46.33	-40.86
