# Supplementary material for: Identification of a GABAergic neural circuit governing leptin signaling deficiency-induced obesity
Source: eLife. 2023 Apr 12;12:e82649. doi: 10.7554/eLife.82649 (PMC10097419; doi:10.7554/eLife.82649)
Supplement: Figure 4—source data 1. [file elife-82649-fig4-data1.xlsx]

## Sheet: Figure 4A
FI (g)	Control	ChR2	Calorie (kcal)	Control	ChR2
1	0.11	0.31	1	0.4	1.1
2	0.11	0.39	2	0.4	1.4
3	0	0.25	3	0	0.9
4	0.03	0.42	4	0.1	1.5
5	0	0.58	5	0	2.1
6	0.06	0.5	6	0.2	1.8
7	0.06	0.17	7	0.2	0.6
8	0.14	0.11	8	0.5	0.4

## Sheet: Figure 4B
	Control							ChR2
Mice/time (min)	-30	0	15	30	60	120		-30	0	15	30	60	120
1	81	93	255	280	180	105		65	100	298	320	270	135
2	81	89	289	299	208	118		82	120	335	355	241	155
3	90	100	279	300	211	99		90	125	322	328	264	146
4	72	90	264	298	223	107		62	115	314	336	267	141
5	95	105	293	328	239	116		79	103	301	320	258	129
6	84	94	281	277	171	96		86	128	346	367	271	157
7	99	83	227	243	138	92		98	103	284	298	219	126
8	76	96	289	315	231	122		74	129	347	378	265	168

## Sheet: Figure 4C
FI (g)	Control	ChR2	Calorie (kcal)	Control	ChR2
1	0.31	0.11	1	1.1	0.4
2	0.22	0.11	2	0.8	0.4
3	0.25	0	3	0.9	0
4	0.22	0.06	4	0.8	0.2
5	0.42	0.03	5	1.5	0.1
6	0.14	0.17	6	0.5	0.6
7	0.06	0.03	7	0.2	0.1
8	0.11	0.06	8	0.4	0.2

## Sheet: Figure 4D
	Control							ChR2
Mice/time (min)	-30	0	15	30	60	120		-30	0	15	30	60	120
1	116	117	263	306	195	153		115	125	217	219	180	135
2	123	126	277	258	258	187		104	120	207	190	189	104
3	110	120	255	275	211	164		110	108	210	228	215	146
4	115	107	267	291	246	172		109	113	194	227	179	105
5	110	110	269	253	231	161		113	114	207	210	178	142
6	113	123	283	284	200	155		109	123	204	193	179	133
7	108	110	270	265	251	174		106	130	191	195	218	145
8	136	155	236	305	179	178		111	108	261	237	219	117

## Sheet: Figure 4E
Dayily FI (g)	Control mice								LepR KO								LepR KO+Bic (DMH)								Control+Bic (DMH)
Day/mice	1	2	3	4	5	6	7	8	1	2	3	4	5	6	7	8	1	2	3	4	5	6	7	8	1	2	3	4	5	6	7	8
0	3.08	3.31	3.61	3.19	3.39	3.28	3.28	3.25	3.81	2.78	3.08	2.78	3.39	3.14	3.39	2.53	3.47	3.25	2.89	3.22	3.61	3.31	3.11	2.81	3.81	2.78	3.08	2.78	3.47	3.25	2.83	3.75
1	3.72	3	3.61	3.72	3.53	3.47	3.58	3.47	3.5	4.11	3.08	3.31	3.28	3.31	3.58	3.83	3.67	3.53	3.22	3.89	3.28	3.53	3.19	4.31	3.5	4.11	3.08	3.31	3.67	3.53	2.58	2.81
2	3.97	3.39	4.19	3.86	3.97	4.14	3.86	3.44	3.97	4.19	3.64	3.97	4.25	3.47	3.33	4.72	3.67	4	4.25	3.64	4.25	3.36	3.69	4.25	3.97	4.19	3.64	3.14	3.67	3.17	2.31	2.75
3	3.81	3.56	3.92	4.03	3.44	4.08	3.56	4.22	3.92	4.14	3.81	3.81	4.11	3.97	3.78	3.81	3.92	3.94	4.28	3.83	3.94	3.42	4.22	4.39	3.92	3.03	3.81	4.08	3.92	2.83	2.58	2.67
4	4.22	3.78	4.03	4	3.42	3.36	3.42	5.83	4.69	4.83	4.28	4.94	4.53	4.44	4.31	5.47	4.25	4.03	4.28	4	3.67	3.89	4.69	4.31	2.86	3.14	3.64	3.44	3.5	2.67	2.75	2.75
5	3.92	3.86	3.78	3.56	3.75	3.94	3.94	3.47	4.33	4.83	4.28	4.94	4.97	4.33	4.67	4.42	4	3.69	4.36	4.28	4.25	3.64	4.33	4.11	2.97	3.39	3.58	4.22	3.19	2.86	2.83	2.56
6	3.81	3.72	3.81	4.17	3.58	4.19	3.44	4.28	4.44	4.83	4.97	4.97	4.25	4.58	4.39	6	4	3.72	4.25	4.33	3.47	4.28	3.36	5.19	3.03	4	3.25	3.53	3.42	2.75	2.61	2.89
7	3.39	2.89	3.72	3.5	3.5	3.64	3.61	2.75	5.22	5.81	4.69	5.64	4.75	4.92	5.47	6.22	4.28	3.47	3.72	4.08	3.89	3.44	3.42	4.81	3.25	3.25	3.97	3.28	2.78	2.58	2.78	2.44
8	4.03	3.19	3.72	3.72	3.67	4.08	3.36	3.56	4.64	5.64	4.86	5.33	5.11	4.92	5.14	5.31	4	4.31	4.31	3.47	3.67	4.06	3.58	4.78	3.11	3.39	3.39	4.08	3.19	2.39	2.61	2.75
9	3.72	3	3.92	3.81	3.78	3.86	3.42	3.39	5.36	5.5	5.17	5.5	5.22	4.75	5.33	6.22	4.53	4.22	4.28	4.03	4.28	3.61	3.86	5.31	3.03	3.75	3	3.94	2.64	2.33	2.83	2.83
10	3.5	3.19	3.5	3.72	4.19	3.75	3.69	2.28	5.22	6.11	5.33	5.5	5.81	5.72	4.83	5.81	3.97	4.53	3.97	4.17	4.5	4.28	4.42	3.44	2.92	3.94	3.22	3.42	2.97	2.5	2.67	2.42
11	3.5	2.67	3.81	3.19	3.25	3.42	3.19	3.31	4.78	5.64	4.86	5.17	5.75	5.39	5.25	4.06	4.42	4.06	3.89	4.53	4.08	4.06	4.17	4.58	3.33	3	3.47	3.67	3.08	2.39	2.56	2.67
12	3.81	3.72	3.81	3.39	3.78	4.03	3.92	3	5.06	4.86	5.81	5.17	4.75	5.39	5.61	5.14	3.81	4.36	4.14	4.44	3.97	3.92	4.69	4.17	3.92	3.31	3.36	3.17	2.86	2.42	2.86	2.92
13	3.92	3.83	3.61	4.11	3.53	4.03	3.44	4.47	5.36	5.94	5.17	5.03	4.83	5.03	5.5	6.14	4.36	4.58	4.28	3.94	3.89	4.33	4.81	4.14	3.75	4.03	3.61	2.78	2.67	2.28	2.89	2.47
14	3.81	4.22	3.72	3.5	3.89	3.69	3.78	3.89	6.36	6.42	5.33	6.58	6.42	5.78	6.28	6.22	4.36	4.56	4.67	4.19	4.19	4.94	4.86	3.78	2.97	4.31	3.28	3.42	2.89	2.11	2.78	2.69
Calorie (kcal)	Control mice								LepR KO								LepR KO+Bic (DMH)								Control+Bic (DMH)
Day/mice	1	2	3	4	5	6	7	8	1	2	3	4	5	6	7	8	1	2	3	4	5	6	7	8	1	2	3	4	5	6	7	8
0	11.1	11.9	13	11.5	12.2	11.8	11.8	11.7	13.7	10	11.1	10	12.2	11.3	12.2	9.1	12.5	11.7	10.4	11.6	13	11.9	11.2	10.1	13.7	10	11.1	10	12.5	11.7	10.2	13.5
1	13.4	10.8	13	13.4	12.7	12.5	12.9	12.5	12.6	14.8	11.1	11.9	11.8	11.9	12.9	13.8	13.2	12.7	11.6	14	11.8	12.7	11.5	15.5	12.6	14.8	11.1	11.9	13.2	12.7	9.3	10.1
2	14.3	12.2	15.1	13.9	14.3	14.9	13.9	12.4	14.3	15.1	13.1	14.3	15.3	12.5	12	17	13.2	14.4	15.3	13.1	15.3	12.1	13.3	15.3	14.3	15.1	13.1	11.3	13.2	11.4	8.3	9.9
3	13.7	12.8	14.1	14.5	12.4	14.7	12.8	15.2	14.1	14.9	13.7	13.7	14.8	14.3	13.6	13.7	14.1	14.2	15.4	13.8	14.2	12.3	15.2	15.8	14.1	10.9	13.7	14.7	14.1	10.2	9.3	9.6
4	15.2	13.6	14.5	14.4	12.3	12.1	12.3	21	16.9	17.4	15.4	17.8	16.3	16	15.5	19.7	15.3	14.5	15.4	14.4	13.2	14	16.9	15.5	10.3	11.3	13.1	12.4	12.6	9.6	9.9	9.9
5	14.1	13.9	13.6	12.8	13.5	14.2	14.2	12.5	15.6	17.4	15.4	17.8	17.9	15.6	16.8	15.9	14.4	13.3	15.7	15.4	15.3	13.1	15.6	14.8	10.7	12.2	12.9	15.2	11.5	10.3	10.2	9.2
6	13.7	13.4	13.7	15	12.9	15.1	12.4	15.4	16	17.4	17.9	17.9	15.3	16.5	15.8	21.6	14.4	13.4	15.3	15.6	12.5	15.4	12.1	18.7	10.9	14.4	11.7	12.7	12.3	9.9	9.4	10.4
7	12.2	10.4	13.4	12.6	12.6	13.1	13	9.9	18.8	20.9	16.9	20.3	17.1	17.7	19.7	22.4	15.4	12.5	13.4	14.7	14	12.4	12.3	17.3	11.7	11.7	14.3	11.8	10	9.3	10	8.8
8	14.5	11.5	13.4	13.4	13.2	14.7	12.1	12.8	16.7	20.3	17.5	19.2	18.4	17.7	18.5	19.1	14.4	15.5	15.5	12.5	13.2	14.6	12.9	17.2	11.2	12.2	12.2	14.7	11.5	8.6	9.4	9.9
9	13.4	10.8	14.1	13.7	13.6	13.9	12.3	12.2	19.3	19.8	18.6	19.8	18.8	17.1	19.2	22.4	16.3	15.2	15.4	14.5	15.4	13	13.9	19.1	10.9	13.5	10.8	14.2	9.5	8.4	10.2	10.2
10	12.6	11.5	12.6	13.4	15.1	13.5	13.3	8.2	18.8	22	19.2	19.8	20.9	20.6	17.4	20.9	14.3	16.3	14.3	15	16.2	15.4	15.9	12.4	10.5	14.2	11.6	12.3	10.7	9	9.6	8.7
11	12.6	9.6	13.7	11.5	11.7	12.3	11.5	11.9	17.2	20.3	17.5	18.6	20.7	19.4	18.9	14.6	15.9	14.6	14	16.3	14.7	14.6	15	16.5	12	10.8	12.5	13.2	11.1	8.6	9.2	9.6
12	13.7	13.4	13.7	12.2	13.6	14.5	14.1	10.8	18.2	17.5	20.9	18.6	17.1	19.4	20.2	18.5	13.7	15.7	14.9	16	14.3	14.1	16.9	15	14.1	11.9	12.1	11.4	10.3	8.7	10.3	10.5
13	14.1	13.8	13	14.8	12.7	14.5	12.4	16.1	19.3	21.4	18.6	18.1	17.4	18.1	19.8	22.1	15.7	16.5	15.4	14.2	14	15.6	17.3	14.9	13.5	14.5	13	10	9.6	8.2	10.4	8.9
14	13.7	15.2	13.4	12.6	14	13.3	13.6	14	22.9	23.1	19.2	23.7	23.1	20.8	22.6	22.4	15.7	16.4	16.8	15.1	15.1	17.8	17.5	13.6	10.7	15.5	11.8	12.3	10.4	7.6	10	9.7
Total calorie	202.3	184.8	204.3	199.7	196.8	205.1	192.6	196.6	254.4	272.3	246.1	261.5	257.1	248.9	255.1	273.2	218.5	216.9	218.8	216.2	212.2	209	217.5	231.7	181.2	193	185	188.1	172.5	144.2	145.7	148.9

## Sheet: Figure 4F
Body weight (g)	Control mice								LepR KO								LepR KO+Bic (DMH)								Control+Bic (DMH)
Day/mice	1	2	3	4	5	6	7	8	1	2	3	4	5	6	7	8	1	2	3	4	5	6	7	8	1	2	3	4	5	6	7	8
0	25.3	24.11	26.74	24.18	22.85	26.7	21.99	23.83	25.71	26.05	23.9	24.1	21.57	26.77	24.53	21.19	23.7	25.65	24.8	27.12	23.33	25.17	27.1	22.24	21.5	24.92	26.37	22.7	23.96	25.41	21.56	26.32
1	25.7	24.45	27.06	25.29	22.96	26.86	22.1	23.93	25.4	25.74	23.71	24.1	22.13	27.04	24.85	21.4	23.77	25.21	25.42	27.5	23.66	25.37	27.26	22.35	21.84	25.02	26.69	22.84	23.67	25.11	21.39	26.32
2	26.59	24.93	27.41	25.29	23.06	27.02	22.19	24.04	24.24	26.65	24.26	24.61	22.33	27.36	25.22	21.72	24.43	25.75	25.89	28.15	23.94	25.62	27.53	22.48	21.74	25.27	27.03	23.06	23.79	25.31	21.56	26.32
3	26.59	26.33	28.1	26.04	23.17	27.23	22.28	24.14	26.33	27.56	25.36	24.51	22.68	27.66	25.61	22.06	24.72	25.91	26.24	28.83	24.12	25.85	27.7	22.66	21.95	25.47	26.92	23.09	24.08	25.66	21.82	26.24
4	27.2	26.04	27.89	26.89	23.24	27.34	22.39	24.26	26.33	26.36	26.91	25.4	22.96	28	25.88	22.42	25.07	25.98	26.61	29.48	24.33	26.08	27.91	22.82	22.04	25.42	26.71	23.2	24.3	25.97	22.12	25.9
5	27.68	26.14	28.29	26.5	23.35	27.55	22.47	24.38	27.9	28.97	27.75	25.81	23.14	28.38	26.27	22.67	25.17	26.34	26.88	29.75	24.57	26.25	28.16	22.91	22.04	25.44	26.82	23.13	24.49	25.99	22.08	26.11
6	28.08	26.33	27.7	26.5	23.49	27.66	22.56	24.5	28.95	30.27	29.59	25.4	23.42	28.72	26.71	22.95	25.74	26.27	27.5	29.8	24.8	26.43	28.35	23.06	22.06	25.54	26.87	23.13	24.68	26.2	22.1	26.06
7	27.58	25.77	28.1	26.31	23.56	27.85	22.63	24.64	29.05	31.65	30.04	25.71	23.77	29.15	27.01	23.33	26.28	26.5	27.78	30.32	25.06	26.58	28.59	23.17	22.15	25.57	26.87	23.15	24.73	26.22	22.06	26.08
8	26.69	25.87	27.6	25.95	23.65	27.98	22.69	24.74	27.9	31.86	30.04	26.41	24.08	29.6	27.38	23.71	26.71	26.83	27.95	30.08	25.24	26.71	28.75	23.35	22.19	25.62	26.9	23.15	25.11	26.43	21.99	25.98
9	26.39	25.32	27.41	26.24	23.76	28.09	22.78	24.83	27.38	31.96	29.85	27.02	24.47	30.03	27.79	23.99	26.54	26.86	27.63	29.89	25.5	26.88	28.97	23.46	22.25	25.67	26.98	23.18	25.01	26.43	22.01	25.95
10	27.27	25.32	27.7	26.04	23.86	28.22	22.89	24.95	28.23	31.96	29.4	26.92	24.67	30.4	28.11	24.39	26.78	26.73	27.33	29.64	25.78	27.01	29.16	23.62	22.3	25.69	27	23.27	25.23	26.66	22.01	25.93
11	27.48	24.86	27.22	26.6	23.99	28.36	22.98	25.07	28.54	32.07	29.21	27.33	24.91	30.83	28.55	24.71	26.66	26.55	27.68	30.05	25.97	27.18	29.4	23.73	22.36	25.69	27.06	23.29	25.4	26.71	21.99	26.06
12	27.68	24.93	27.11	26.31	24.11	28.54	23.09	25.16	29.67	32.56	29.49	27.33	25.28	31.26	28.85	24.96	26.43	26.55	27.83	30.51	26.2	27.33	29.65	23.84	22.4	25.67	27.08	23.27	25.49	27.01	21.97	25.9
13	27.48	25.03	27.11	26.6	24.22	28.68	23.2	25.28	29.26	32.88	29.59	27.43	25.59	31.58	29.29	25.22	26.45	26.91	27.88	30.48	26.55	27.49	29.81	23.97	22.45	25.72	27.13	23.31	25.45	27.14	22.03	25.95
14	27.78	25.12	27.3	26.69	24.36	28.89	23.29	25.4	29.46	32.95	29.85	27.93	25.89	31.98	29.78	25.45	26.62	26.83	28.05	30.62	26.78	27.71	30.08	24.13	22.47	25.77	27.16	23.29	25.66	27.19	22.01	25.93
change of BW	2.48	1.01	0.56	2.51	1.51	2.19	1.3	1.57	3.75	6.9	5.95	3.83	4.32	5.21	5.25	4.26	2.92	1.18	3.25	3.5	3.45	2.54	2.98	1.89	0.97	0.85	0.79	0.59	1.7	1.78	0.45	-0.39
Normalized BW	Control mice								LepR KO								LepR KO+Bic (DMH)								Control+Bic (DMH)
Day/mice	1	2	3	4	5	6	7	8	1	2	3	4	5	6	7	8	1	2	3	4	5	6	7	8	1	2	3	4	5	6	7	8
0	100	100	100	100	100	100	100	100	100	100	100	100	100	100	100	100	100	100	100	100	100	100	100	100	100	100	100	100	100	100	100	100
1	101.6	101.4	101.2	104.6	100.5	100.6	100.5	100.4	98.8	98.8	99.2	100	101.3	101.4	101.3	101	100.3	98.3	102.5	101.4	101.4	100.8	100.6	100.5	101.6	100.4	101.2	100.6	98.8	98.8	99.2	100
2	105.1	103.4	102.5	104.6	100.9	101.2	100.9	100.9	94.3	102.3	101.5	102.1	102.2	102.6	102.8	102.5	103.1	100.4	104.4	103.8	102.6	101.8	101.6	101.1	101.1	101.4	102.5	101.6	99.3	99.6	100	100
3	105.1	109.2	105.1	107.7	101.4	102	101.3	101.3	102.4	105.8	106.1	101.7	103.8	103.7	104.4	104.1	104.3	101	105.8	106.3	103.4	102.7	102.2	101.9	102.1	102.2	102.1	101.7	100.5	101	101.2	99.7
4	107.5	108	104.3	111.2	101.7	102.4	101.8	101.8	102.4	101.2	112.6	105.4	105.1	105	105.5	105.8	105.8	101.3	107.3	108.7	104.3	103.6	103	102.6	102.5	102	101.3	102.2	101.4	102.2	102.6	98.4
5	109.4	108.4	105.8	109.6	102.2	103.2	102.2	102.3	108.5	111.2	116.1	107.1	105.9	106.4	107.1	107	106.2	102.7	108.4	109.7	105.3	104.3	103.9	103	102.5	102.1	101.7	101.9	102.2	102.3	102.4	99.2
6	111	109.2	103.6	109.6	102.8	103.6	102.6	102.8	112.6	116.2	123.8	105.4	107.2	107.7	108.9	108.3	108.6	102.4	110.9	109.9	106.3	105	104.6	103.7	102.6	102.5	101.9	101.9	103	103.1	102.5	99
7	109	106.9	105.1	108.8	103.1	104.3	102.9	103.4	113	121.5	125.7	106.7	108.8	109.3	110.1	110.1	110.9	103.3	112	111.8	107.4	105.6	105.5	104.2	103	102.6	101.9	102	103.2	103.2	102.3	99.1
8	105.5	107.3	103.2	107.3	103.5	104.8	103.2	103.8	108.5	122.3	125.7	109.6	110.2	111	111.6	111.9	112.7	104.6	112.7	110.9	108.2	106.1	106.1	105	103.2	102.8	102	102	104.8	104	102	98.7
9	104.3	105	102.5	108.5	104	105.2	103.6	104.2	106.5	122.7	124.9	112.1	112	112.6	113.3	113.2	112	104.7	111.4	110.2	109.3	106.8	106.9	105.5	103.5	103	102.3	102.1	104.4	104	102.1	98.6
10	107.8	105	103.6	107.7	104.4	105.7	104.1	104.7	109.8	122.7	123	111.7	112.9	114	114.6	115.1	113	104.2	110.2	109.3	110.5	107.3	107.6	106.2	103.7	103.1	102.4	102.5	105.3	104.9	102.1	98.5
11	108.6	103.1	101.8	110	105	106.2	104.5	105.2	111	123.1	122.2	113.4	114	115.6	116.4	116.6	112.5	103.5	111.6	110.8	111.3	108	108.5	106.7	104	103.1	102.6	102.6	106	105.1	102	99
12	109.4	103.4	101.4	108.8	105.5	106.9	105	105.6	115.4	125	123.4	113.4	115.7	117.2	117.6	117.8	111.5	103.5	112.2	112.5	112.3	108.6	109.4	107.2	104.2	103	102.7	102.5	106.4	106.3	101.9	98.4
13	108.6	103.8	101.4	110	106	107.4	105.5	106.1	113.8	126.2	123.8	113.8	117.1	118.4	119.4	119	111.6	104.9	112.4	112.4	113.8	109.2	110	107.8	104.4	103.2	102.9	102.7	106.2	106.8	102.2	98.6
14	109.8	104.2	102.1	110.4	106.6	108.2	105.9	106.6	114.6	126.5	124.9	115.9	118.5	119.9	121.4	120.1	112.3	104.6	113.1	112.9	114.8	110.1	111	108.5	104.5	103.4	103	102.6	107.1	107	102.1	98.5

## Sheet: Figure 4G
	Control					Lepr KO					Bic DMH					Control+Bic (DMH)
Mice/time (min)	0	15	30	60	120	0	15	30	60	120	0	15	30	60	120	0	15	30	60	120
1	121	257	296	188	166	154	434	461	260	196	130	267	360	245	144	121	257	296	188	166
2	121	252	318	176	138	135	299	428	274	165	108	205	318	177	125	121	252	318	176	138
3	126	229	267	195	133	122	298	384	212	141	112	277	355	198	165	126	229	267	195	133
4	144	249	289	171	155	146	307	477	292	177	125	268	312	161	133	144	249	289	171	155
5	152	253	290	177	162	137	384	402	255	187	110	241	348	211	140	100	195	329	104	100
6	124	238	320	175	137	145	316	397	232	155	129	266	319	204	145	86	198	277	137	118
7	121	243	331	189	151	149	436	513	242	153	111	279	339	239	158	78	222	275	166	143
8	153	263	225	180	164	122	281	381	302	212	111	210	358	152	121	132	251	174	191	156

## Sheet: Figure 4H-K
4H
Mice/groups	Control	Lepr KO	KO+Bic	Control+Bic (DMH)	Calorie	Control	Lepr KO	KO+Bic	Control+Bic (DMH)
1	1.03	0.75	0.81	1.03	1	3.7	2.7	2.9	3.7
2	2	0.28	0.83	0.61	2	7.2	1	3	2.2
3	1.47	0.31	1.36	0.53	3	5.3	1.1	4.9	1.9
4	2.83	0.28	0.56	0.86	4	10.2	1	2	3.1
5	1.5	0.17	0.78	1	5	5.4	0.6	2.8	3.6
6	0.69	0.14	0.97	0.5	6	2.5	0.5	3.5	1.8
7	0.33	0.42	0.53	0	7	1.2	1.5	1.9	0
8	0.64	0.89	1.22	0.25	8	2.3	3.2	4.4	0.9
4I
	Control									Lepr KO									KO+Bic									Control+Bic (DMH)
	1	2	3	4	5	6	7	8		1	2	3	4	5	6	7	8		1	2	3	4	5	6	7	8		1	2	3	4	5	6	7	8
total calorie	202.3	184.8	204.3	199.7	196.8	205.1	192.6	196.6		254.4	272.3	246.1	261.5	257.1	248.9	255.1	273.2		218.5	216.9	218.8	216.2	212.2	209	217.5	231.7		181.2	193	185	188.1	172.5	144.2	145.7	148.9
change of BW	2.48	1.01	0.56	2.51	1.51	2.19	1.3	1.57		3.75	6.9	5.95	3.83	4.32	5.21	5.25	4.26		2.92	1.18	3.25	3.5	3.45	2.54	2.98	1.89		0.97	0.85	0.79	0.59	1.7	1.78	0.45	-0.39
Feed efficiency	12.26	5.47	2.74	12.57	7.67	10.68	6.75	7.99		14.74	25.34	24.18	14.65	16.8	20.93	20.58	15.59		13.36	5.44	14.85	16.19	16.26	12.15	13.7	8.16		5.35	4.4	4.27	3.14	9.86	12.34	3.09	-2.62
4J
	Control									Lepr KO									KO+Bic									Control+Bic (DMH)
Weight (g)	1	2	3	4	5	6	7	8	Weight (g)	1	2	3	4	5	6	7	8		1	2	3	4	5	6	7	8		1	2	3	4	5	6	7	8
Visc WAT	0.82	0.68	0.53	0.77	0.91	0.66	0.71	0.48		1.57	1.68	2.81	1.84	1.12	1.35	1.97	3.46		0.95	1.38	1.87	0.86	1.22	0.74	1.37	1.73		0.75	0.43	0.68	0.72	0.45	0.51	0.61	0.47
BAT	0.26	0.55	0.67	0.53	0.96	0.27	0.55	0.34		0.58	0.71	0.35	0.29	0.49	0.25	0.77	0.42		0.55	0.6	0.42	0.29	0.22	0.71	0.19	0.74		0.85	0.73	0.23	0.49	0.35	0.42	0.33	0.5
4K
	Control									Lepr KO									KO+Bic									Control+Bic (DMH)
RQ (VCO2/VO2)	1	2	3	4	5	6	7	8		1	2	3	4	5	6	7	8		1	2	3	4	5	6	7	8		1	2	3	4	5	6	7	8
	0.97	0.97	0.92	0.99	0.88	0.99	0.99	0.99		0.84	0.87	0.9	0.91	0.8	0.86	0.92	0.94		0.94	0.93	0.98	0.95	0.87	0.95	0.99	0.99		0.95	0.86	0.99	0.9	0.99	0.93	0.98	0.97

## Sheet: Figure 4L-O
4L			4M			4N			4O
Firing rate	Baseline			Foraging			Baseline			Glucose i.p.
Time (s)	MC4R neuron	Non-MC4R neurons		MC4R neuron	Non-MC4R neurons		MC4R neuron	Non-MC4R neurons		MC4R neuron	Non-MC4R neurons
1	10	9		2	2		5	9		3	7
2	6	5		3	5		11	10		9	10
3	5	8		6	6		6	11		9	10
4	14	9		2	6		13	4		6	8
5	4	6		6	9		13	3		8	5
6	6	2		6	7		10	5		4	4
7	12	6		5	7		5	4		8	9
8	13	3		2	4		14	8		11	9
9	6	5		1	2		14	3		5	11
10	14	4		8	7		7	2		11	7
11	6	5		4	4		6	2		11	10
12	4	9		8	8		6	4		4	8
13	10	10		7	4		5	6		6	7
14	14	5		8	9		4	5		4	8
15	6	9		3	9		7	3		10	4
16	14	10		2	2		13	7		10	6
17	7	5		8	9		15	10		9	8
18	11	10		2	1		10	10		10	9
19	5	7		7	4		11	6		6	5
20	13	10		8	3		13	11		9	8
21	5	9		9	3		6	11		6	4
22	11	9		5	4		12	5		2	7
23	7	3		8	1		7	7		11	4
24	10	9		5	4		9	7		2	7
25	11	10		6	10		8	5		6	3
26	14	5		8	5		8	5		3	5
27	10	7		6	4		7	2		4	7
28	6	4		7	7		9	4		6	7
29	5	4		10	3		12	4		9	5
30	8	3		8	7		11	5		6	4
31	14	9		9	5		9	9		3	2
32	5	5		5	2		15	10		11	9
33	6	3		6	5		5	9		11	2
34	4	6		2	7		4	8		3	5
35	13	2		9	6		6	7		5	10
36	9	5		2	8		15	5		4	9
37	6	3		8	3		5	3		9	2
38	15	6		10	5		9	4		5	8
39	9	3		7	3		7	8		9	6
40	6	5		7	8		12	5		4	2
41	14	6		6	7		13	7		10	7
42	10	7		10	9		8	9		11	5
43	6	5		2	5		10	8		8	7
44	13	6		5	7		7	4		3	8
45	13	7		5	7		8	3		7	10
46	11	7		6	4		9	10		3	6
47	11	3		3	8		14	11		8	7
48	13	9		5	3		15	11		8	10
49	12	8		1	6		12	11		5	9
50	11	3		5	3		7	4		7	10
51	5	3		6	7		6	10		8	3
52	11	7		2	8		7	3		6	4
53	10	10		5	10		14	9		10	6
54	13	4		5	8		13	9		3	8
55	6	4		4	10		13	8		7	6
56	4	4		7	4		12	6		6	3
57	11	9		2	9		6	5		5	3
58	14	5		7	3		7	5		8	8
59	6	4		6	2		4	9		6	4
60	6	3		2	8		11	3		7	8
61	13	7		6	8		13	11		4	10
62	6	3		5	8		11	10		3	8
63	10	9		6	5		11	4		3	4
64	11	10		4	3		6	5		3	5
65	9	8		10	6		9	7		6	5
66	15	7		3	9		8	7		9	6
67	7	6		9	3		13	5		9	11
68	8	7		4	5		7	7		8	3
69	8	6		3	6		5	7		3	10
70	8	3		9	9		7	8		3	3
71	11	5		2	6		11	3		6	10
72	9	8		3	1		7	5		6	4
73	10	8		1	8		8	3		2	3
74	7	5		6	1		7	9		10	7
75	14	5		3	8		7	7		2	5
76	7	7		7	3		12	6		7	4
77	11	5		4	2		14	7		10	3
78	4	9		2	6		9	10		10	7
79	6	2		5	6		15	2		11	4
80	5	9		4	8		6	9		5	6
81	8	3		10	9		14	11		3	6
82	12	7		5	3		5	9		4	9
83	14	9		8	1		12	10		9	4
84	7	9		8	2		14	4		8	4
85	11	10		9	6		7	5		3	8
86	5	9		7	8		11	8		5	6
87	15	9		3	7		15	6		6	2
88	7	3		7	8		14	3		11	4
89	8	11		5	7		14	10		7	3
90	12	9		8	5		10	7		7	7
91	5	5		4	8		12	8		4	9
92	13	6		1	7		5	3		10	6
93	9	3		10	8		13	9		9	2
94	10	8		8	8		9	5		6	5
95	13	9		5	10		14	8		6	6
96	15	8		6	8		8	3		7	8
97	12	3		5	2		5	3		4	7
98	14	8		1	4		12	6		4	3
99	10	6		3	9		6	5		8	3
100	7	6		4	5		13	4		8	8
101	11	3		6	9		10	10		6	6
102	8	7		9	6		10	9		6	2
103	6	2		3	8		8	9		8	6
104	10	9		6	4		12	8		10	6
105	5	2		8	9		8	10		2	8
106	5	5		4	2		11	4		3	3
107	4	3		8	8		8	5		4	10
108	8	7		9	3		10	8		5	6
109	14	6		7	5		10	6		5	4
110	9	9		8	6		8	7		4	3
111	6	4		6	4		14	5		4	3
112	11	6		1	5		14	3		7	3
113	14	10		8	8		14	2		7	8
114	10	9		7	1		4	10		11	4
115	12	6		3	5		15	3		7	9
116	8	4		8	5		13	3		10	9
117	11	8		2	10		10	3		8	4
118	7	10		3	8		7	8		8	8
119	9	7		3	4		12	8		6	11
120	5	2		3	3		10	4		4	11

## Sheet: Figure 4P-Q
4P	Baseline										Foraging
MC4R	9.4	11.2	12.3	8.5	11.2	8.3	7.6	6.9	10.3	9.1	4.5	6.8	8.2	4.2	5.5	3.7	2.9	5.6	3.7	7.2
Non-MC4R	6.2	4.2	8.6	9.3	4.3	5.5	4.1	6.3	4.1	7.9	5.3	6.4	7.9	8.5	3.5	4.5	6.7	5.4	8.7	6
4Q	Baseline										Glucose
MC4R	11.2	9.6	8.5	13.2	10.2	9.4	8.1	12.1	7.4	9.5	7.8	5.5	7.5	8.3	9.8	6.1	5.2	7.6	4.3	6.4
Non-MC4R	5.6	4.2	3.9	7.8	6.2	4.5	3.7	5.8	3.2	4.7	6.3	2.8	7.6	3.5	5.5	9.1	4.7	6.9	5.4	6
