# Supplementary material for: Identification of a GABAergic neural circuit governing leptin signaling deficiency-induced obesity
Source: eLife. 2023 Apr 12;12:e82649. doi: 10.7554/eLife.82649 (PMC10097419; doi:10.7554/eLife.82649)
Supplement: Figure 5—source data 1. [file elife-82649-fig5-data1.xlsx]

## Sheet: Figure 5A
	Control									Lepr KO
Gabra1	0.89	6.12*	0.27	1.14	3.91	0.59	0.9	0.21	1.4	2.16	1.63	2.39	1.37	2.54	2.44	2.42	0.39	0.49
Gabra2	4.64*	3.93*	1.26	0.91	1.91	1.42	0.3	0.93	0.84	1.54	0.96	0.69	0.76	0.83	0.13	1.51	0.19	0.28
Gabra3	2.73	1.92	0.56	0.76	3.48	2.25	1.14	1.03	0.05	1.38	2.53	1.44	3.34	4.68	3.57	6.88	5.31	4.49
Gabra4	0.82	5.09	1.16	0.18	5.53	0.43	1.38	2.57	0.71	1.39	0.51	1.35	0.96	0.63	0.73	0.01	1.15	4.35
Gabra5	1.82	1.07	0.25	1.47	3.52	2.8	0.28	0.54	1.58	0.4	0.5	2.49	0.32	1.92	1.18	4.57	0.35	2.88
Gabra6	1.62			0.55	0.49	3.76						1.52		0.53		0.74

## Sheet: Figure 5F
Dayily FI (g)	Control mice								a3 OE								a3 KO
Day/mice	1	2	3	4	5	6	7	8	1	2	3	4	5	6	7	8	1	2	3	4	5	6	7	8
0	2.67	3.14	2.94	2.36	3.53	3	3.42	2.75	2.42	2.72	3.39	3.19	2.67	3.58	2.69	2.78	2.83	2.31	2.08	3.08	2.86	2.28	2.78	2.39
1	2.44	2.94	3.03	2.67	3.47	2.64	3.08	2.42	2.67	1.92	3.22	3.39	2.53	2.94	2.83	2.89	2.67	2.17	1.86	2.92	2.92	1.81	2.56	2.33
2	2.58	2.69	3.06	2.42	3.61	2.75	3	2.17	2.33	2.36	2.89	3.5	3.28	2.42	2.36	3.03	2.64	2.03	1.78	2.78	2.69	2.81	2.19	1.53
3	2.81	3.42	2.97	2.44	3.25	2.97	3.22	2.19	2.44	2.86	3.14	3.42	3.25	3.5	3.42	1.69	2.78	2	1.75	2.69	2.5	1.86	2.28	2.58
4	2.19	3	2.33	2.5	2.92	3.42	2.61	1.81	2.64	2.64	3.5	3.33	2.72	3.61	2.97	2.81	2.5	1.86	1.61	2.56	1.97	1.83	1.78	2.94
5	2.28	3.22	2.67	2.5	3.56	3.25	3.11	2.14	2.42	2.83	3.28	3.31	3.56	2.5	3.25	2.53	2.36	1.78	1.5	2.5	2.69	1.72	2.5	1.22
6	2.39	3.25	2.75	2.67	3.69	2.89	3.08	2.47	2.86	2.56	3.03	3.44	2.64	2.89	2.56	3.81	2.22	1.72	1.69	2.58	1.69	1.89	2.08	2.56
7	2.5	3.33	2.97	2.89	3.64	3.08	3.06	2.47	2.56	2.58	3.19	3.25	2.58	3.28	2.83	2.89	2.08	2.03	1.64	2.42	2.03	2.64	2.03	1.47
8	2.19	3.64	3.42	3	3.56	2.94	2.97	2.47	2.33	2.75	3.22	3.28	3	3.33	2.69	2.56	2.31	1.89	1.72	2.67	2.56	1.86	2.17	2
9	2.86	2.47	3.19	2.11	3.31	2.72	3.28	2.58	2.53	2.78	3.08	3.42	2.97	3.25	3.14	2.44	2.17	1.5	1.5	2.56	2.06	1.78	1.86	2.03
10	3.08	2.69	3.28	2.47	3.53	2.42	3.53	2.72	2.67	3.22	3.42	3.44	3.28	3	3.14	3.33	2.22	1.36	1.47	2.47	2.14	1.69	2.58	1.11
11	2.64	2.5	3.61	2.58	3.58	2.67	2.86	3.17	2.86	3.42	3.75	3.58	3.33	3.08	3.25	3.94	2.28	2.14	1.69	2.42	2.5	2.53	1.81	1.69
12	2.72	3	2.97	2.61	3.03	2.56	3	3.31	2.78	3.67	3.39	3.75	3.53	3.72	2.81	3.53	2.25	1.78	1.72	2.56	1.81	1.78	1.81	2.92
13	2.03	3.14	3.03	2.94	3	2.86	2.67	2.86	2.94	3.44	3.64	3.78	3.86	3.08	2.92	3.94	2.06	1.83	1.67	2.58	2.28	2.58	2.75	0.53
14	2.19	3.25	3.08	2.89	3.22	3	2.5	2.61	3.31	3.44	3.75	3.89	2.83	3.19	3.75	4.61	1.92	2.11	1.56	2.39	2.53	2.42	1.78	1.25
15	2.36	3.36	3.42	3.11	3.31	2.61	2.75	2.94	3.39	3.22	3.47	3.75	3.83	3.5	3.08	3.42	2.11	1.97	1.5	2.44	1.81	1.78	2.22	2.22
16	2.5	3.44	3.44	3.14	3.33	2.39	2.97	2.97	3.22	3.44	3.58	3.78	3.28	3.72	2.83	4.19	2.42	1.94	1.42	2.53	1.94	2.42	2.08	1.86
17	2.92	3	3	3.39	3.33	2.42	3.14	3.06	3.36	3.61	3.64	3.53	2.86	3.06	3.83	4.39	2.19	2.14	1.72	2.5	2.08	2.06	2.53	1.89
18	2.75	3.17	3.03	2.94	3.56	2.58	3.44	3.42	3.44	3.78	3.36	4.03	3.72	3.58	3.44	3.86	2.36	1.83	1.75	2.19	1.89	2.64	2.58	1.03
19	2.86	2.94	2.47	3.53	3.44	2.19	3.22	3.36	3.47	3.19	3.83	3.61	3.25	2.97	2.92	4.97	1.86	1.81	1.78	2.17	2.42	2	1.72	1.47
20	2.33	2.97	3.5	2.72	3.25	2.08	2.97	2.97	3.81	3.5	3.5	3.92	3.56	3.69	3.03	4.44	2.03	2.11	1.67	2.42	2.25	2.67	1.67	1.64
21	2.47	3.33	3.25	2.75	3.64	2.78	3.36	2.61	3.5	3.53	3.72	3.67	3.44	3.44	3.75	3.78	2.08	2	1.64	2.56	2.39	1.92	2.06	1.92
Calorie (kcal)	Control mice								a3 OE								a3 KO
Day/mice	1	2	3	4	5	6	7	8	1	2	3	4	5	6	7	8	1	2	3	4	5	6	7	8
0	9.6	11.3	10.6	8.5	12.7	10.8	12.3	9.9	8.7	9.8	12.2	11.5	9.6	12.9	9.7	10	10.2	8.3	7.5	11.1	10.3	8.2	10	8.6
1	8.8	10.6	10.9	9.6	12.5	9.5	11.1	8.7	9.6	6.9	11.6	12.2	9.1	10.6	10.2	10.4	9.6	7.8	6.7	10.5	10.5	6.5	9.2	8.4
2	9.3	9.7	11	8.7	13	9.9	10.8	7.8	8.4	8.5	10.4	12.6	11.8	8.7	8.5	10.9	9.5	7.3	6.4	10	9.7	10.1	7.9	5.5
3	10.1	12.3	10.7	8.8	11.7	10.7	11.6	7.9	8.8	10.3	11.3	12.3	11.7	12.6	12.3	6.1	10	7.2	6.3	9.7	9	6.7	8.2	9.3
4	7.9	10.8	8.4	9	10.5	12.3	9.4	6.5	9.5	9.5	12.6	12	9.8	13	10.7	10.1	9	6.7	5.8	9.2	7.1	6.6	6.4	10.6
5	8.2	11.6	9.6	9	12.8	11.7	11.2	7.7	8.7	10.2	11.8	11.9	12.8	9	11.7	9.1	8.5	6.4	5.4	9	9.7	6.2	9	4.4
6	8.6	11.7	9.9	9.6	13.3	10.4	11.1	8.9	10.3	9.2	10.9	12.4	9.5	10.4	9.2	13.7	8	6.2	6.1	9.3	6.1	6.8	7.5	9.2
7	9	12	10.7	10.4	13.1	11.1	11	8.9	9.2	9.3	11.5	11.7	9.3	11.8	10.2	10.4	7.5	7.3	5.9	8.7	7.3	9.5	7.3	5.3
8	7.9	13.1	12.3	10.8	12.8	10.6	10.7	8.9	8.4	9.9	11.6	11.8	10.8	12	9.7	9.2	8.3	6.8	6.2	9.6	9.2	6.7	7.8	7.2
9	10.3	8.9	11.5	7.6	11.9	9.8	11.8	9.3	9.1	10	11.1	12.3	10.7	11.7	11.3	8.8	7.8	5.4	5.4	9.2	7.4	6.4	6.7	7.3
10	11.1	9.7	11.8	8.9	12.7	8.7	12.7	9.8	9.6	11.6	12.3	12.4	11.8	10.8	11.3	12	8	4.9	5.3	8.9	7.7	6.1	9.3	4
11	9.5	9	13	9.3	12.9	9.6	10.3	11.4	10.3	12.3	13.5	12.9	12	11.1	11.7	14.2	8.2	7.7	6.1	8.7	9	9.1	6.5	6.1
12	9.8	10.8	10.7	9.4	10.9	9.2	10.8	11.9	10	13.2	12.2	13.5	12.7	13.4	10.1	12.7	8.1	6.4	6.2	9.2	6.5	6.4	6.5	10.5
13	7.3	11.3	10.9	10.6	10.8	10.3	9.6	10.3	10.6	12.4	13.1	13.6	13.9	11.1	10.5	14.2	7.4	6.6	6	9.3	8.2	9.3	9.9	1.9
14	7.9	11.7	11.1	10.4	11.6	10.8	9	9.4	11.9	12.4	13.5	14	10.2	11.5	13.5	16.6	6.9	7.6	5.6	8.6	9.1	8.7	6.4	4.5
15	8.5	12.1	12.3	11.2	11.9	9.4	9.9	10.6	12.2	11.6	12.5	13.5	13.8	12.6	11.1	12.3	7.6	7.1	5.4	8.8	6.5	6.4	8	8
16	9	12.4	12.4	11.3	12	8.6	10.7	10.7	11.6	12.4	12.9	13.6	11.8	13.4	10.2	15.1	8.7	7	5.1	9.1	7	8.7	7.5	6.7
17	10.5	10.8	10.8	12.2	12	8.7	11.3	11	12.1	13	13.1	12.7	10.3	11	13.8	15.8	7.9	7.7	6.2	9	7.5	7.4	9.1	6.8
18	9.9	11.4	10.9	10.6	12.8	9.3	12.4	12.3	12.4	13.6	12.1	14.5	13.4	12.9	12.4	13.9	8.5	6.6	6.3	7.9	6.8	9.5	9.3	3.7
19	10.3	10.6	8.9	12.7	12.4	7.9	11.6	12.1	12.5	11.5	13.8	13	11.7	10.7	10.5	17.9	6.7	6.5	6.4	7.8	8.7	7.2	6.2	5.3
20	8.4	10.7	12.6	9.8	11.7	7.5	10.7	10.7	13.7	12.6	12.6	14.1	12.8	13.3	10.9	16	7.3	7.6	6	8.7	8.1	9.6	6	5.9
21	8.9	12	11.7	9.9	13.1	10	12.1	9.4	12.6	12.7	13.4	13.2	12.4	12.4	13.5	13.6	7.5	7.2	5.9	9.2	8.6	6.9	7.4	6.9
Total calorie	200.8	244.5	242.7	218.3	269.1	216.8	242.1	214.1	230.2	242.9	270	281.7	251.9	256.9	243	273	181.2	152.3	132.2	201.5	180	169	172.1	146.1

## Sheet: Figure 5G
Body weight (g)	Control mice								a3 OE								a3 KO
Day/mice	1	2	3	4	5	6	7	8	1	2	3	4	5	6	7	8	1	2	3	4	5	6	7	8
0	25.35	21.84	26.37	24.9	23.15	25.6	24.92	27.33	28.41	27.6	27.32	25	26.77	24.8	27.32	22.43	25.71	21.69	26.3	28.2	24.68	22.6	27.42	25.7
1	25.05	21.8	25.84	25.02	23.29	25.8	25.12	27.41	28.55	26.91	27.24	25.1	27.01	25.05	27.57	22.63	25.48	21.62	26.22	27.97	24.75	22.62	27.56	25.67
2	25.15	21.95	26.05	25.1	23.4	25.96	25.34	27.52	28.61	27.05	27.32	25.2	27.12	25.3	27.89	22.81	25.07	21.58	26.3	27.75	24.83	22.67	27.64	25.62
3	25.3	22.06	26.26	25.17	23.54	26.16	25.57	27.63	28.69	27.1	27.18	25.33	27.25	25.49	28.11	23.06	24.84	21.52	26.3	27.52	24.88	22.69	27.75	25.57
4	25.4	22.19	26.26	25.25	23.68	26.32	25.79	27.74	28.75	27.19	27.27	25.43	27.49	25.74	28.44	23.3	24.68	21.41	26.22	27.44	24.93	22.71	27.86	25.55
5	25.55	22.52	26.37	25.3	23.8	26.47	26.07	27.82	28.86	27.35	27.43	25.55	27.68	25.97	28.66	23.57	24.35	21.28	26.22	27.44	24.98	22.76	27.97	25.52
6	25.7	22.52	26.55	25.4	23.89	26.65	26.34	27.96	28.95	27.35	27.57	25.68	27.92	26.24	28.99	23.87	25.07	21.62	26.59	27.61	25.05	22.78	28.08	25.47
7	25.73	22.69	26.69	25.45	23.96	26.83	26.54	28.1	29.6	27.41	27.78	25.78	28.16	26.51	29.26	24.09	26.2	22.04	27.01	27.83	25.12	22.8	28.16	25.42
8	25.86	22.8	26.77	25.55	24.1	27.06	26.84	28.23	29.8	27.63	28.03	25.85	28.35	26.78	29.56	24.27	26.1	21.93	26.72	27.66	25.2	22.83	28.24	25.39
9	25.96	22.89	27.06	25.65	24.24	27.24	27.04	28.34	30.03	27.99	28.41	25.98	28.54	27.03	29.89	24.47	25.94	21.76	26.51	27.61	25.27	22.87	28.32	25.37
10	26.24	22.93	27.45	25.7	24.31	27.44	27.24	28.45	30.6	28.35	28.71	26.08	28.78	27.26	30.22	24.67	25.86	21.69	26.38	27.52	25.35	22.92	28.43	25.34
11	26.34	23	27.66	25.75	24.42	27.65	27.54	28.56	31.19	28.76	29.31	26.2	28.91	27.5	30.57	24.92	25.86	21.62	26.51	27.83	25.4	22.96	28.52	25.29
12	26.54	23.13	27.9	25.85	24.52	27.8	27.81	28.64	31.65	29.34	29.56	26.28	29.15	27.7	30.82	25.14	25.79	21.58	26.8	28.12	25.45	23.01	28.65	25.26
13	26.77	23.15	28.19	25.97	24.61	27.96	28.11	28.78	32.07	29.75	29.89	26.4	29.39	27.97	31.09	25.41	25.79	21.52	27.01	28.43	25.52	23.03	28.79	25.24
14	26.85	23.24	28.35	26.1	24.72	28.11	28.41	28.86	32.42	30.08	30.3	26.53	29.55	28.27	31.45	25.62	25.79	21.62	27.14	28.74	25.59	23.07	28.9	25.19
15	26.95	23.33	28.53	26.19	24.82	28.31	28.63	29	32.73	30.28	30.6	26.63	29.8	28.52	31.75	25.88	25.86	21.58	27.19	28.88	25.64	23.1	29.04	25.16
16	27.07	23.54	29.14	26.29	24.91	28.54	28.88	29.11	32.96	30.53	30.9	26.73	29.98	28.72	32.1	26.13	25.94	21.45	27.35	29.02	25.69	23.14	29.15	25.13
17	27.23	23.65	29.3	26.39	25.03	28.72	29.13	29.24	33.18	30.83	31.36	26.85	30.2	28.97	32.37	26.31	26.02	21.52	27.56	29.33	25.77	23.19	29.26	25.11
18	27.4	23.83	29.61	26.44	25.12	28.9	29.33	29.38	33.58	31.02	31.55	26.95	30.44	29.24	32.62	26.56	26.1	21.58	27.69	29.64	25.84	23.21	29.34	25.06
19	27.73	23.91	29.96	26.52	25.23	29.13	29.58	29.46	33.89	31.41	31.91	27.03	30.6	29.46	32.87	26.8	26.2	21.62	27.83	29.86	25.89	23.26	29.48	25.03
20	28.06	24.22	30.43	26.64	25.35	29.34	29.83	29.57	34.04	31.71	31.99	27.13	30.81	29.76	33.19	27.12	26.28	21.62	27.9	30.17	25.96	23.23	29.61	25.01
change of BW	2.71	2.38	4.06	1.74	2.2	3.74	4.91	2.24	5.63	4.11	4.67	2.13	4.04	4.96	5.87	4.69	0.57	-0.07	1.6	1.97	1.28	0.63	2.19	-0.69
Normalized BW	Control mice								a3 OE								a3 KO
Day/mice	1	2	3	4	5	6	7	8	1	2	3	4	5	6	7	8	1	2	3	4	5	6	7	8
0	100	100	100	100	100	100	100	100	100	100	100	100	100	100	100	100	100	100	100	100	100	100	100	100
1	98.8	99.8	98	100.5	100.6	100.8	100.8	100.3	100.5	97.5	99.7	100.4	100.9	101	100.9	100.9	99.1	99.7	99.7	99.2	100.3	100.1	100.5	99.9
2	99.2	100.5	98.8	100.8	101.1	101.4	101.7	100.7	100.7	98	100	100.8	101.3	102	102.1	101.7	97.5	99.5	100	98.4	100.6	100.3	100.8	99.7
3	99.8	101	99.6	101.1	101.7	102.2	102.6	101.1	101	98.2	99.5	101.3	101.8	102.8	102.9	102.8	96.6	99.2	100	97.6	100.8	100.4	101.2	99.5
4	100.2	101.6	99.6	101.4	102.3	102.8	103.5	101.5	101.2	98.5	99.8	101.7	102.7	103.8	104.1	103.9	96	98.7	99.7	97.3	101	100.5	101.6	99.4
5	100.8	103.1	100	101.6	102.8	103.4	104.6	101.8	101.6	99.1	100.4	102.2	103.4	104.7	104.9	105.1	94.7	98.1	99.7	97.3	101.2	100.7	102	99.3
6	101.4	103.1	100.7	102	103.2	104.1	105.7	102.3	101.9	99.1	100.9	102.7	104.3	105.8	106.1	106.4	97.5	99.7	101.1	97.9	101.5	100.8	102.4	99.1
7	101.5	103.9	101.2	102.2	103.5	104.8	106.5	102.8	104.2	99.3	101.7	103.1	105.2	106.9	107.1	107.4	101.9	101.6	102.7	98.7	101.8	100.9	102.7	98.9
8	102	104.4	101.5	102.6	104.1	105.7	107.7	103.3	104.9	100.1	102.6	103.4	105.9	108	108.2	108.2	101.5	101.1	101.6	98.1	102.1	101	103	98.8
9	102.4	104.8	102.6	103	104.7	106.4	108.5	103.7	105.7	101.4	104	103.9	106.6	109	109.4	109.1	100.9	100.3	100.8	97.9	102.4	101.2	103.3	98.7
10	103.5	105	104.1	103.2	105	107.2	109.3	104.1	107.7	102.7	105.1	104.3	107.5	109.9	110.6	110	100.6	100	100.3	97.6	102.7	101.4	103.7	98.6
11	103.9	105.3	104.9	103.4	105.5	108	110.5	104.5	109.8	104.2	107.3	104.8	108	110.9	111.9	111.1	100.6	99.7	100.8	98.7	102.9	101.6	104	98.4
12	104.7	105.9	105.8	103.8	105.9	108.6	111.6	104.8	111.4	106.3	108.2	105.1	108.9	111.7	112.8	112.1	100.3	99.5	101.9	99.7	103.1	101.8	104.5	98.3
13	105.6	106	106.9	104.3	106.3	109.2	112.8	105.3	112.9	107.8	109.4	105.6	109.8	112.8	113.8	113.3	100.3	99.2	102.7	100.8	103.4	101.9	105	98.2
14	105.9	106.4	107.5	104.8	106.8	109.8	114	105.6	114.1	109	110.9	106.1	110.4	114	115.1	114.2	100.3	99.7	103.2	101.9	103.7	102.1	105.4	98
15	106.3	106.8	108.2	105.2	107.2	110.6	114.9	106.1	115.2	109.7	112	106.5	111.3	115	116.2	115.4	100.6	99.5	103.4	102.4	103.9	102.2	105.9	97.9
16	106.8	107.8	110.5	105.6	107.6	111.5	115.9	106.5	116	110.6	113.1	106.9	112	115.8	117.5	116.5	100.9	98.9	104	102.9	104.1	102.4	106.3	97.8
17	107.4	108.3	111.1	106	108.1	112.2	116.9	107	116.8	111.7	114.8	107.4	112.8	116.8	118.5	117.3	101.2	99.2	104.8	104	104.4	102.6	106.7	97.7
18	108.1	109.1	112.3	106.2	108.5	112.9	117.7	107.5	118.2	112.4	115.5	107.8	113.7	117.9	119.4	118.4	101.5	99.5	105.3	105.1	104.7	102.7	107	97.5
19	109.4	109.5	113.6	106.5	109	113.8	118.7	107.8	119.3	113.8	116.8	108.1	114.3	118.8	120.3	119.5	101.9	99.7	105.8	105.9	104.9	102.9	107.5	97.4
20	110.7	110.9	115.4	107	109.5	114.6	119.7	108.2	119.8	114.9	117.1	108.5	115.1	120	121.5	120.9	102.2	99.7	106.1	107	105.2	102.8	108	97.3

## Sheet: Figure 5H
	Control					a3 OE					a3 KO
Mice/time (min)	0	15	30	60	120	0	15	30	60	120	0	15	30	60	120
1	77	263	234	165	111	96	359	396	252	113	86	177	168	152	105
2	80	235	265	177	96	110	368	332	215	153	93	182	184	165	96
3	95	270	263	183	123	79	312	374	279	127	60	236	228	189	110
4	82	225	325	268	116	97	334	379	217	119	80	239	237	204	99
5	90	281	338	271	121	96	352	341	213	141	65	194	201	180	102
6	68	213	286	210	85	95	336	333	264	154	66	189	201	152	102
7	95	257	317	156	132	96	343	389	230	138	73	237	187	194	93
8	77	294	283	163	96	91	367	395	319	103	91	191	223	188	112

## Sheet: Figure 5I-J
5I
	Control									a3 OE									a3 KO
	1	2	3	4	5	6	7	8		1	2	3	4	5	6	7	8		1	2	3	4	5	6	7	8
total calorie	200.8	244.5	242.7	218.3	269.1	216.8	242.1	214.1		230.2	242.9	270	281.7	251.9	256.9	243	273		181.2	152.3	132.2	201.5	180	169	172.1	146.1
change of BW	2.71	2.38	4.06	1.74	2.2	3.74	4.91	2.24		5.63	4.11	4.67	2.13	4.04	4.96	5.87	4.69		0.57	-0.07	1.6	1.97	1.28	0.63	2.19	-0.69
Feed efficiency	13.5	9.73	16.73	7.97	8.18	17.25	20.28	10.46		24.46	16.92	17.3	7.56	16.04	19.31	24.16	17.18		3.15	-0.46	12.1	9.78	7.11	3.73	12.73	-4.72
5J
	Control									a3 OE									a3 KO
Weight (g)	1	2	3	4	5	6	7	8	Weight (g)	1	2	3	4	5	6	7	8		1	2	3	4	5	6	7	8
Visc WAT	0.55	0.43	0.69	0.58	0.32	0.51	0.68	0.74		0.97	1.21	1.58	0.79	0.32	1.24	0.85	1.99		0.21	0.47	0.22	0.3	0.45	0.37	0.12	0.26
BAT	0.38	0.57	0.29	0.44	0.71	0.32	0.42	0.23		0.58	0.69	0.42	0.28	1.07	0.52	0.13	0.25		0.49	0.67	0.37	0.41	0.23	0.65	0.34	0.72

## Sheet: Figure 5K
Dayily FI (g)	Control+leptin								a3 OE+leptin
Day/mice	1	2	3	4	5	6	7	8	1	2	3	4	5	6	7	8
0	3.61	2.67	2.75	2.39	3.75	2.5	3.56	2.17	2.14	2.83	3.61	2.61	2.94	2.81	2.33	3.61
1	2.58	2.11	3.17	3.75	3.14	2.92	3.64	3.53	2.44	2.75	3.69	2.58	2.92	2.61	2.28	4.42
2	2.39	3.19	3.39	3.69	3	2.67	3.03	3.64	1.97	2.67	3.58	2.81	2.89	3.64	1.83	2.53
3	2.94	3.42	3.58	2.47	2.92	2.92	2.28	3.44	2.33	2.58	3.81	3.11	3.14	3.39	2.39	2.5
4	2.31	3.83	3.94	2.28	3.81	2.58	2.03	2.92	2.11	2.78	3.58	2.31	3.19	3.36	1.92	3.33
5	2.25	2.92	2.39	3.17	2.11	3.58	3.56	2.06	2.44	2.67	3.67	3.36	3	2.69	2.53	3.06
6	2.67	2.67	2.28	3.61	2.56	3.42	2.36	3.67	2.28	2.53	3.47	3.83	2.06	2.67	2.64	2.61
7	2.83	2.17	2.31	2.5	2.86	1.64	2.39	1.86	2.58	2.72	3.39	2.44	3.06	3.36	2.39	3.25
8	2.19	2.08	2.5	2.22	1.44	2.97	1.03	1.14	2.42	2.58	3.31	2.61	2.58	3.47	2.75	2.42
9	2.67	1.97	1.5	1.33	1.25	2.03	2.58	2.33	2.58	2.61	3.17	3.72	2.64	2.81	1.92	2.86
10	1.39	2.11	2.17	1.17	1.28	2.42	2.58	1.83	2.44	2.72	2.94	2.61	2.25	3.81	2.11	2.75
11	2.64	1.19	2.72	1.53	1.17	1.69	1.56	2.28	2.64	2.36	3.14	2.78	3.19	3.69	2.42	1.47
12	1.17	2.03	1.03	2.56	2.61	1.17	2.36	1.25	2.53	2.67	3.19	3.06	3	3.81	2.75	1.36
13	1.44	2.36	1.08	1.47	1.5	2.61	2.53	2.11	2.67	2.83	3.39	2.42	2.47	3.86	2.28	3.78
14	1.69	1.61	2	1.89	2.17	2.42	1.17	1.11	2.42	2.58	2.97	2.75	2.31	2.83	2.5	2.89
15	2.31	1.39	1.61	1.42	2.47	1.86	1.86	1.42	2.36	2.56	3.25	2.81	3.22	2.94	2.28	2.36
16	1.83	2.47	1.94	2	1.86	1.14	1.94	1.28	2.39	2.47	3.31	2.42	2.03	3.47	2.64	3.06
17	1.64	1.56	1.11	1.83	1.36	1.64	2.08	1.39	2.5	2.69	3.33	2.83	2.69	3	2.67	3.03
18	1.08	2.14	2.31	2	1.03	1.86	1.28	2.08	2.47	2.81	3.08	2.25	3.33	3.33	2.33	2.69
19	2.03	1.69	1.11	2.22	1.11	1.14	1.69	1.67	2.36	2.75	3.42	2.97	2.78	2.67	2.53	3.28
20	2.31	1.17	1.78	1.69	1.97	1.25	1.17	1.81	2.42	2.64	3.08	2.72	2	2.75	1.67	4.42
21	1.89	2	1.22	1.58	1.17	1.92	1.75	2.08	2.28	2.5	3.28	3.58	2.19	3.06	2.5	2.08
Calorie (kcal)	Control+leptin								a3 OE+leptin
Day/mice	1	2	3	4	5	6	7	8	1	2	3	4	5	6	7	8
0	13	9.6	9.9	8.6	13.5	9	12.8	7.8	7.7	10.2	13	9.4	10.6	10.1	8.4	13
1	9.3	7.6	11.4	13.5	11.3	10.5	13.1	12.7	8.8	9.9	13.3	9.3	10.5	9.4	8.2	15.9
2	8.6	11.5	12.2	13.3	10.8	9.6	10.9	13.1	7.1	9.6	12.9	10.1	10.4	13.1	6.6	9.1
3	10.6	12.3	12.9	8.9	10.5	10.5	8.2	12.4	8.4	9.3	13.7	11.2	11.3	12.2	8.6	9
4	8.3	13.8	14.2	8.2	13.7	9.3	7.3	10.5	7.6	10	12.9	8.3	11.5	12.1	6.9	12
5	8.1	10.5	8.6	11.4	7.6	12.9	12.8	7.4	8.8	9.6	13.2	12.1	10.8	9.7	9.1	11
6	9.6	9.6	8.2	13	9.2	12.3	8.5	13.2	8.2	9.1	12.5	13.8	7.4	9.6	9.5	9.4
7	10.2	7.8	8.3	9	10.3	5.9	8.6	6.7	9.3	9.8	12.2	8.8	11	12.1	8.6	11.7
8	7.9	7.5	9	8	5.2	10.7	3.7	4.1	8.7	9.3	11.9	9.4	9.3	12.5	9.9	8.7
9	9.6	7.1	5.4	4.8	4.5	7.3	9.3	8.4	9.3	9.4	11.4	13.4	9.5	10.1	6.9	10.3
10	5	7.6	7.8	4.2	4.6	8.7	9.3	6.6	8.8	9.8	10.6	9.4	8.1	13.7	7.6	9.9
11	9.5	4.3	9.8	5.5	4.2	6.1	5.6	8.2	9.5	8.5	11.3	10	11.5	13.3	8.7	5.3
12	4.2	7.3	3.7	9.2	9.4	4.2	8.5	4.5	9.1	9.6	11.5	11	10.8	13.7	9.9	4.9
13	5.2	8.5	3.9	5.3	5.4	9.4	9.1	7.6	9.6	10.2	12.2	8.7	8.9	13.9	8.2	13.6
14	6.1	5.8	7.2	6.8	7.8	8.7	4.2	4	8.7	9.3	10.7	9.9	8.3	10.2	9	10.4
15	8.3	5	5.8	5.1	8.9	6.7	6.7	5.1	8.5	9.2	11.7	10.1	11.6	10.6	8.2	8.5
16	6.6	8.9	7	7.2	6.7	4.1	7	4.6	8.6	8.9	11.9	8.7	7.3	12.5	9.5	11
17	5.9	5.6	4	6.6	4.9	5.9	7.5	5	9	9.7	12	10.2	9.7	10.8	9.6	10.9
18	3.9	7.7	8.3	7.2	3.7	6.7	4.6	7.5	8.9	10.1	11.1	8.1	12	12	8.4	9.7
19	7.3	6.1	4	8	4	4.1	6.1	6	8.5	9.9	12.3	10.7	10	9.6	9.1	11.8
20	8.3	4.2	6.4	6.1	7.1	4.5	4.2	6.5	8.7	9.5	11.1	9.8	7.2	9.9	6	15.9
21	6.8	7.2	4.4	5.7	4.2	6.9	6.3	7.5	8.2	9	11.8	12.9	7.9	11	9	7.5
Total calorie	172.3	175.5	172.4	175.6	167.5	174	174.3	169.4	190	209.9	265.2	225.3	215.6	252.1	185.9	229.5

## Sheet: Figure 5L
Body weight (g)	Control+leptin								a3 OE+leptin
Day/mice	1	2	3	4	5	6	7	8	1	2	3	4	5	6	7	8
0	23.53	27.82	26.5	24.77	24.69	25.98	28.67	27.4	27.9	26.38	27.39	24.62	22.31	21.68	25.7	27.81
1	23.41	27.88	26.55	24.82	24.74	26.01	28.78	27.43	27.93	26.33	27.53	24.77	22.47	21.77	25.85	27.98
2	23.48	27.96	26.53	24.89	24.76	26.03	28.84	27.45	27.98	26.43	27.72	24.94	22.64	21.9	25.98	28.14
3	23.55	28.04	26.63	25.02	24.81	26.08	28.93	27.51	28.23	26.51	28.18	25.11	22.82	22.01	26.09	28.37
4	23.65	28.15	26.66	25.09	24.86	26.14	28.99	27.56	28.4	26.59	28.16	25.26	22.96	22.16	26.19	28.56
5	23.74	28.38	26.77	25.14	24.89	26.16	29.04	27.62	28.43	26.7	28.27	25.38	23.11	22.27	26.27	28.7
6	23.84	28.46	26.77	25.22	24.94	26.21	29.16	27.65	28.54	26.83	28.27	25.56	23.22	22.35	26.39	28.92
7	23.84	28.4	26.84	25.27	24.99	26.24	29.27	27.67	28.49	26.83	28.43	25.7	23.31	22.5	26.47	29.17
8	23.74	28.32	26.82	25.27	25.04	26.29	29.36	27.7	28.6	26.78	28.54	25.92	23.47	22.59	26.55	29.42
9	23.65	28.24	26.9	25.34	25.09	26.32	29.47	27.73	28.63	26.96	28.65	26.15	23.6	22.68	26.68	29.56
10	23.62	28.27	26.98	25.39	25.13	26.37	29.53	27.78	28.88	26.96	28.68	26.34	23.69	22.81	26.78	29.78
11	23.67	28.29	27.03	25.41	25.18	26.42	29.62	27.84	29.02	27.04	28.81	26.49	23.8	22.87	26.91	29.92
12	23.65	28.35	27.06	25.41	25.21	26.45	29.73	27.87	29.43	27.28	29.01	26.71	23.94	23	27.01	30.17
13	23.67	28.38	27	25.44	25.23	26.5	29.79	27.89	29.63	27.51	29.12	26.93	24.07	23.11	27.09	30.37
14	23.65	28.43	27.16	25.51	25.26	26.55	29.9	27.92	29.8	27.88	29.5	27.06	24.25	23.2	27.24	30.51
15	23.69	28.46	27.14	25.64	25.31	26.58	29.99	27.95	29.85	28.17	29.8	27.25	24.36	23.33	27.34	30.7
16	23.79	28.52	27.16	25.69	25.36	26.63	30.07	28	29.91	28.41	29.94	27.48	24.56	23.46	27.47	30.9
17	23.84	28.6	27.22	25.74	25.38	26.68	30.16	28.06	30.27	28.73	30.38	27.6	24.74	23.57	27.63	31.04
18	23.95	28.71	27.22	25.81	25.43	26.73	30.28	28.09	30.58	29.02	30.46	27.77	24.9	23.72	27.78	31.26
19	24	28.79	27.27	25.86	25.46	26.79	30.33	28.11	30.91	29.28	30.73	27.94	25.03	23.85	27.91	31.48
20	24.12	28.85	27.35	25.93	25.5	26.73	30.42	28.06	31	29.33	31.03	28.17	25.14	23.96	28.06	31.68
change of BW	0.59	1.03	0.85	1.16	0.81	0.75	1.75	0.66	3.1	2.95	3.64	3.55	2.83	2.28	2.36	3.87
Normalized BW	Control+leptin								a3 OE+leptin
Day/mice	1	2	3	4	5	6	7	8	1	2	3	4	5	6	7	8
0	100	100	100	100	100	100	100	100	100	100	100	100	100	100	100	100
1	99.5	100.2	100.2	100.2	100.2	100.1	100.4	100.1	100.1	99.8	100.5	100.6	100.7	100.4	100.6	100.6
2	99.8	100.5	100.1	100.5	100.3	100.2	100.6	100.2	100.3	100.2	101.2	101.3	101.5	101	101.1	101.2
3	100.1	100.8	100.5	101	100.5	100.4	100.9	100.4	101.2	100.5	102.9	102	102.3	101.5	101.5	102
4	100.5	101.2	100.6	101.3	100.7	100.6	101.1	100.6	101.8	100.8	102.8	102.6	102.9	102.2	101.9	102.7
5	100.9	102	101	101.5	100.8	100.7	101.3	100.8	101.9	101.2	103.2	103.1	103.6	102.7	102.2	103.2
6	101.3	102.3	101	101.8	101	100.9	101.7	100.9	102.3	101.7	103.2	103.8	104.1	103.1	102.7	104
7	101.3	102.1	101.3	102	101.2	101	102.1	101	102.1	101.7	103.8	104.4	104.5	103.8	103	104.9
8	100.9	101.8	101.2	102	101.4	101.2	102.4	101.1	102.5	101.5	104.2	105.3	105.2	104.2	103.3	105.8
9	100.5	101.5	101.5	102.3	101.6	101.3	102.8	101.2	102.6	102.2	104.6	106.2	105.8	104.6	103.8	106.3
10	100.4	101.6	101.8	102.5	101.8	101.5	103	101.4	103.5	102.2	104.7	107	106.2	105.2	104.2	107.1
11	100.6	101.7	102	102.6	102	101.7	103.3	101.6	104	102.5	105.2	107.6	106.7	105.5	104.7	107.6
12	100.5	101.9	102.1	102.6	102.1	101.8	103.7	101.7	105.5	103.4	105.9	108.5	107.3	106.1	105.1	108.5
13	100.6	102	101.9	102.7	102.2	102	103.9	101.8	106.2	104.3	106.3	109.4	107.9	106.6	105.4	109.2
14	100.5	102.2	102.5	103	102.3	102.2	104.3	101.9	106.8	105.7	107.7	109.9	108.7	107	106	109.7
15	100.7	102.3	102.4	103.5	102.5	102.3	104.6	102	107	106.8	108.8	110.7	109.2	107.6	106.4	110.4
16	101.1	102.5	102.5	103.7	102.7	102.5	104.9	102.2	107.2	107.7	109.3	111.6	110.1	108.2	106.9	111.1
17	101.3	102.8	102.7	103.9	102.8	102.7	105.2	102.4	108.5	108.9	110.9	112.1	110.9	108.7	107.5	111.6
18	101.8	103.2	102.7	104.2	103	102.9	105.6	102.5	109.6	110	111.2	112.8	111.6	109.4	108.1	112.4
19	102	103.5	102.9	104.4	103.1	103.1	105.8	102.6	110.8	111	112.2	113.5	112.2	110	108.6	113.2
20	102.5	103.7	103.2	104.7	103.3	102.9	106.1	102.4	111.1	111.2	113.3	114.4	112.7	110.5	109.2	113.9

## Sheet: Figure 5M
	Control+leptin					a3 OE+leptin
Mice/time (min)	0	15	30	60	120	0	15	30	60	120
1	65	178	216	156	103	78	235	357	283	113
2	79	199	176	139	111	86	195	296	257	157
3	83	196	236	175	85	93	277	317	197	86
4	94	163	176	129	74	80	186	226	152	122
5	71	190	206	160	88	85	233	325	179	93
6	82	165	216	148	91	78	208	312	189	137
7	89	197	189	180	106	85	264	312	254	137
8	79	184	193	111	88	89	188	247	267	111

## Sheet: Figure 5N-O
5N
	Control+leptin									a3 OE+leptin
	1	2	3	4	5	6	7	8		1	2	3	4	5	6	7	8
total calorie	172.3	175.5	172.4	175.6	167.5	174	174.3	169.4		190	209.9	265.2	225.3	215.6	252.1	185.9	229.5
change of BW	0.59	1.03	0.85	1.16	0.81	0.75	1.75	0.66		3.1	2.95	3.64	3.55	2.83	2.28	2.36	3.87
Feed efficiency	3.42	5.87	4.93	6.61	4.84	4.31	10.04	3.9		16.32	14.05	13.73	15.76	13.13	9.04	12.69	16.86
5O
	Control+leptin									a3 OE+leptin
Weight (g)	1	2	3	4	5	6	7	8	Weight (g)	1	2	3	4	5	6	7	8
Visc WAT	0.22	0.41	0.56	0.3	0.27	0.66	0.13	0.52		0.82	0.69	1.08	0.95	0.74	0.83	1.22	0.79
BAT	0.5	0.23	0.4	0.58	0.31	0.63	0.55	0.11		0.45	0.58	0.42	0.58	0.37	0.32	0.27	0.85

## Sheet: Figure 5P-R
5P
	HFD								HFD+α3 KO
	1	2	3	4	5	6	7	8	1	2	3	4	5	6	7	8
FI in 24 hrs	12.5	15.3	13.1	14.2	12.7	15.6	17.6	9.5	9.6	10.3	8.2	12.3	9.4	7.3	9.9	12.5
5Q
	HFD								HFD+α3 KO
	1	2	3	4	5	6	7	8	1	2	3	4	5	6	7	8
BW change in 24hrs	3.2	1.5	3.9	2.2	2.4	0.9	2.8	3.4	1.2	0.5	1.1	2.4	0.2	0	0.9	1.5
5R	HFD								HFD+α3 KO
FI	1	2	3	4	5	6	7	8	1	2	3	4	5	6	7	8
1h	3.5	4.6	5.7	4.9	3.2	2.9	4.6	6.8	2.8	3.1	4.1	1.5	3.6	6.7	2.3	0.9
2h	5.9	9.3	11.5	8.7	5.6	5.1	7.9	9.3	3.9	5.7	7.3	3.4	5.3	8.9	4.1	2.9
4h	7.8	12.3	13.2	9.7	9.3	8.3	9.3	14.1	5.1	7.5	8.2	4.1	7.9	9.6	6.5	4.7
